1 **Synergistic regulation of bZIP53 and dimerizing partners results in abnormal seed**  
2 **phenotype in Arabidopsis: Use of a designed dominant negative protein A-ZIP53**

3 Prateek Jain<sup>1#</sup>, and Vikas Rishi<sup>1\*</sup>

4  
5 *<sup>1</sup>National Agri-Food Biotechnology Institute, Knowledge City, Sector 81,*  
6 *Mohali, Punjab 140306, India.*

7 #Present address: Department of Biology, University of North Carolina at  
8 Chapel Hill, Chapel Hill, North Carolina 27599, USA

9  
10  
11  
12  
13  
14  
15  
16  
17  
18  
19  
20  
21  
22  
23  
24  
25  
26  
27  
28  
29  
30

\*Corresponding author: Email: [vikasrishi@nabi.res.in](mailto:vikasrishi@nabi.res.in)

Alternate email: [vrishi09@gmail.com](mailto:vrishi09@gmail.com)

Website: [www.nabi.res.in](http://www.nabi.res.in)

31 **ABSTRACT**

32 In *Arabidopsis*, basic leucine zipper (bZIP) family of transcription factors (TFs) are key proteins  
33 to regulate the expression of seed maturation (MAT) genes. bZIPs are functionally redundant and  
34 their DNA-binding activity is dependent on dimerization partner. The intervention of loss of  
35 function mutation is inadequate to understand and regulate the redundant behavior of TFs and one  
36 such example is bZIP53, which is known as a key regulator of seed maturation phenomena. Here,  
37 to examine the consequences of hindering the function of bZIP53 and its known and unknown  
38 heterodimerizing partners, a transgenic *Arabidopsis* constitutively expressing a novel dominant  
39 negative (DN) protein A-ZIP53 was raised. Transgenic plants demonstrated a delayed growth and  
40 retarded seed phenotype. The *in vivo* inhibition of DNA binding of bZIP53, bZIP10, and bZIP25  
41 to the G-box demonstrated the efficacy of A-ZIP53 protein. In first generation, majority of plants  
42 failed to survive beyond four weeks suggesting a pleiotropic nature of bZIP53. Plants expressing  
43 *A-ZIP53* have small flower, shorter siliques, and small-seeded phenotype. RNA seq analysis of the  
44 transgenic lines revealed the reduced expression of target genes of bZIP53 and its heterodimerizing  
45 partners. Furthermore, immunoprecipitation followed by mass spectrometry (IP-MS/MS) of  
46 transgenic plants helped to identify the additional heterodimerizing partners of the A-ZIP53. The  
47 interactions were subsequently confirmed with the transient transfection experiments. Unlike other  
48 gene knock out technologies, DN protein can inhibit the function of members of the same group  
49 of bZIP TFs.

50 .

51

52

53

54

55

56

57

58

59

## 60 **Introduction**

61 Gene expression is controlled by dynamic interaction between various biological components  
62 including hormones, small RNAs, transcription factor (TFs), epigenetic modification etc. These  
63 interactions are spatial or temporal in which DNA binding TFs are master regulators. TFs regulate  
64 the function of a target gene in an additive fashion or cooperative manner by the homo- or  
65 heterotypic interactions. In *Arabidopsis*, these dimeric interactions regulate several process  
66 including seed development and maturation, which is well studied and explored (Alonso et al.  
67 2009; Santos-Mendoza et al. 2008).

68 Seed maturation is a fine-tuned process, which occurs only in angiosperm. This process  
69 collectively occurs in different part of seed, which ultimately contributes to seed quality (Vicente-  
70 Carbajosa and Carbonero 2004; Kumar et al. 2018). It is divided into different phases in which  
71 early and mid-phase are dominated by action of ABA and in late phase ABA level decreases  
72 followed by the synthesis of Late embryogenesis abundant (LEA) protein (Tunnacliffe and Wise  
73 2007). Seed maturation is a complex process and the intervention of high throughput genome and  
74 transcriptome technologies have helped to identify target genes (Sreenivasulu and Wobus 2013).  
75 Maturation phase is controlled singly or in combination via seed storage protein genes (SSP) such  
76 as, *ABI3*, *FUS3*, and *LEC1* (Braybrook et al. 2006; Jakoby et al. 2002; Parcy et al. 1994; Santos-  
77 Mendoza et al. 2008). Mutation in these genes result in severely affected seed phenotype with  
78 reduced content of seed storage proteins (To et al. 2006). Besides defects in seed development,  
79 mutants display other pleiotropic effects like chlorophyll accumulation in dry seeds, desiccation  
80 intolerance, defected cotyledon identity, and others (Bensmihen et al. 2005; Boyes et al. 2001;  
81 Keith et al. 1994; Kroj et al. 2003; Meinke et al. 1998; Meinke et al. 1994; Parcy et al. 1994; Stone  
82 et al. 2001). Although, previous studies have shown the involvement of these genes in seed  
83 development, but the mechanism regarding their interaction and regulation is not well defined (To  
84 et al. 2006). The expression of Maturation associated (MAT) genes are under the tight control of  
85 several cis regulatory element including ACGT elements, RY (CATGCA), AACAA, and CTTT  
86 motifs (Vicente-Carbajosa and Carbonero 2004), which are the binding site for various  
87 transcription factors including B3, MYB, and basic leucine zipper (bZIP) (Santos-Mendoza et al.  
88 2008).

89 bZIPs are the eukaryotic class of TFs that bind to DNA in a sequence specific manner. It  
90 is a bipartite structure in which N- terminal act as a DNA binding domain while dimerization is  
91 done by C- terminal. These TFs bind to their cognate site as a dimer. These dimeric interactions  
92 are dynamic and responsible for the homo- or heterotypic interactions (Acharya et al. 2006;  
93 Amoutzias et al. 2008; Landschulz et al. 1988). Structurally, bZIP dimerization depends on amino  
94 acid present at the ‘a’, ‘d’, ‘e’, and ‘g’ positions in heptad, which defines the affinity and specificity  
95 of the dimeric interactions (Deppmann et al. 2006; Vinson et al. 1993). These dimeric interactions  
96 are responsible for redundant behavior of bZIP TFs (Alonso et al. 2009; Dietrich et al. 2011).

97 In *Arabidopsis thaliana*, sequence similarity have been used to predict the number and  
98 possible dimerization partner of bZIPs (Deppmann et al. 2006; Jakoby et al. 2002). They can form  
99 a network, which regulate the myriad of biological processes. As reported earlier, bZIP of Group  
100 C and S (Jakoby et al. 2002) can form C/S1 network and participate in seed maturation (Alonso et  
101 al. 2009), energy homeostasis (Baena-González et al. 2007), amino acid metabolism (Dietrich et  
102 al. 2011; Weltmeier et al. 2006; Weltmeier et al. 2009) , and salt stress (Hartmann et al. 2015).  
103 Several bZIPs like ABI-5, bZIP67 (Belmonte et al. 2013), bZIP15, and bZIP72 (Le et al. 2010)  
104 are known to be involved in seed maturation and among these, bZIP53 has been reported as a key  
105 regulator of maturation associated genes (MAT) (Alonso et al. 2009). bZIP53 with its  
106 heterodimerizing partners bZIP10 or bZIP25 is involved in the regulation of MAT genes  
107 expression (Alonso et al. 2009). On the other hand, bZIP53|bZIP1 heterodimer has been reported  
108 in salt stress (Hartmann et al. 2015). In general, the dimerizing partner selection is responsible for  
109 the pleiotropic and redundant behavior of target bZIP TFs.

110 Recently, we have reported a novel dominant negative (DN) protein approach to regulate the  
111 dimeric interaction of target bZIP TFs involved in seed maturation (Jain et al. 2018; Jain et al.  
112 2017). The efficacy of novel protein A-ZIP53 and its derivatives against wild-type bZIP53 and its  
113 heterodimerizing partners were shown *in vitro* and *in vivo* (Jain et al. 2018; Jain et al. 2017). Here,  
114 we have generated transgenic *Arabidopsis* expressing DN protein A-ZIP53 under the constitutive  
115 promoter and examined the effects on the growth and development. Transgenic lines have a  
116 differential growth pattern and abnormal seed phenotype. The effect of A-ZIP53 on the seed  
117 maturation was confirmed with the down regulation of seed-specific genes. RNA-seq analysis  
118 helped us to understand the effect of A-ZIP53 expression on the overall expression profile in

119 plants. Furthermore, the immunoprecipitation followed by mass spectrometry (IP-MS) was used  
120 to identify the additional heterodimerizing bZIP partners of A-ZIP53. The transient transfection  
121 assay confirmed the heterodimeric interaction between the A-ZIP53 and new immunoprecipitated  
122 bZIPs. Therefore, we propose the efficacy of the novel designed DN protein *A-ZIP53* against target  
123 bZIPs and dimerizing partners. The DN protein can be used to regulate the redundant behavior of  
124 the target protein and to predict the unknown dimerizing partners. Ultimately, it will help to  
125 understand and regulate the redundant behavior of target bZIP TF.

## 126 **Results:**

### 127 **A-ZIP53 transgene expression causes delayed growth phenotype in *Arabidopsis***

128 In a previous study, we have biochemically characterized dominant negative (DN) protein A-  
129 ZIP53 and its derivatives. The efficacies of designed proteins were demonstrated *in vitro* and *ex*  
130 *vivo* (Jain et al. 2018; Jain et al. 2017). A-ZIP53 is designed to specifically target bZIP53 and its  
131 known heterodimeric partners and inhibit their DNA binding thus down-regulating associated  
132 genes. Earlier in gel shift experiments and transient transfection studies, we have shown the ability  
133 of A-ZIP53 in inhibiting DNA binding activities of bZIP53 and its known dimerizing partners i.e.,  
134 bZIP10 and bZIP25 (Alonso et al. 2009; Hartmann et al. 2015; Jain et al. 2018; Jain et al. 2017).  
135 The interaction between bZIP53 and other bZIPs like bZIP10, bZIP25, bZIP63, and bZIP14 were  
136 also confirmed using yeast two-hybrid system and applying transient transfections in *Arabidopsis*  
137 protoplast (Ehlert et al. 2006; Weltmeier et al. 2006; Weltmeier et al. 2009), suggesting a  
138 pleotropic behavior of bZIP53 with a possible role(s) in different physiological and metabolic  
139 pathways (Alonso et al. 2009; Hartmann et al. 2015). To understand the consequences of inhibiting  
140 DNA binding activities of bZIP53 and its heterodimerizing partners in seed maturation, A-ZIP53  
141 was expressed under a constitutive promoter (p35S: A-ZIP53) in the wild type *Arabidopsis* (Col-  
142 0 background) (Figure 1A).

143 A-ZIP53 expressing transgenic plants were analyzed for growth and other physiological  
144 parameters. Most of transgenic plants showed altered phenotypes including retarded growth,  
145 dwarfism, and late flowering compared to wild type. A positive correlation was observed between  
146 expression levels of A-ZIP53 as confirmed by qRT-PCR and severity of the phenotype (Figure  
147 1B, C).

148 Because of the apparent differential expression of A-ZIP53 and corresponding phenotype,  
149 independent transformants of *Arabidopsis* were identified and carried for the next generation. The  
150 chosen lines were probed for A-ZIP53 by Western blots and lines with a high expression were  
151 selected (Figure 2A). Unlike wildtype, A-ZIP53 expressing transgenic plants showed delayed  
152 growth phenotype (Figure 2 B and 2C). Plants had stunted growth, small sized flower, shorter  
153 silique, and small seeds. Number of seed in the individual silique were 8 -10 compared to >40 in  
154 the wild type (Figure 2D). These results and earlier studies suggest severe phenotype in A-ZIP53  
155 expressing plants may be due to inhibition of DNA binding activity of bZIP53 and its known and  
156 unknown partners (Hartmann et al. 2015; Alonso et al. 2009).

157

### 158 **A-ZIP53 inhibits the DNA binding of *bZIP53*, *bZIP10*, and *bZIP25***

159 bZIP53 plays a central role in regulating seed maturation genes and ectopic expression of *bZIP53*  
160 resulted in the activation of seed-specific genes (Alonso et al. 2009). bZIP53 binds to DNA as  
161 homodimer or as heterodimer with bZIP10, and bZIP25. In earlier we have quantified these  
162 interactions using biophysical techniques and gel shift experiments (Jain et al. 2018; Jain et al.  
163 2017). To investigate the ability of A-ZIP53 in inhibiting the functions of target bZIP53 and its  
164 interacting partners, transient transfections were performed using protoplast derived from BY-2  
165 tobacco cell line. For transfection assays, DNA construct coding A-ZIP53, bZIP53, bZIP10, and  
166 bZIP25 were co-transfected with the reporter plasmid (GUS expression under 2S2 promoter) and  
167 control plasmid (35S:NAN). Reduced GUS signals were observed when cells were co- transfected  
168 with A-ZIP53 plasmid and showed dose-dependence. Signals were normalized to those of  
169 35S:NAN control plasmid (Figure 3A). Furthermore, GUS signal increased significantly when  
170 cells were co-transfected with bZIP53, bZIP10, and bZIP25 suggesting heterotypic interaction  
171 between *bzip53*, *bzip10*, and *bzip25*. Interestingly, when cells were co-transfected with A-ZIP53  
172 under above mentioned conditions, GUS signals decreased significantly strongly suggesting that  
173 A-ZIP53 can inhibit the activities of all three bZIP TFs (Figure 3B). These results confirmed the  
174 *in vivo* efficacy of the A-ZIP53 against target bZIP TFs.

### 175 ***in-silico* promoter analysis of target genes**

176 Protein binding microarray (Weirauch et al. 2014), DAP-seq (O'Malley et al. 2016), Bimolecular  
177 Fluorescent Complementation (BiFC) (Llorca et al. 2015), ChIP, and bZIP over expression data

178 used to predict target genes of bZIP TFs potentially participate in seed development and maturation  
179 (Weltmeier et al. 2009; Alonso et al. 2009; Weltmeier et al. 2006). Seven genes comprising  
180 cruciferin (*CRU*), asparagine synthase1 (*ASNI*), cruciferina (*CRA*), hydroxysteroid dehydrogenase  
181 1(*HSDI*), seed storage albumin (*2S2*), Proline dehydrogenase (*ProDH*), and late embryogenesis  
182 accumulating 76 (*LEA76*), (Supplementary table S1) (Alonso et al. 2009)shortlisted for promoter  
183 analysis to mark the presence of G-box (ACGTG) (Table I), a potential known binding site for  
184 bZIP10 and bZIP25(Lara et al. 2003). **Interestingly**, promoter of target genes also possesses the  
185 DNA binding sites for other bZIP TF including bZIP39 (ACGTG) that suggests a possible  
186 interaction and functional synergism between two bZIPs.

### 187 **Expression profiling of seed-specific genes regulated by bZIPs**

188 Gene investigator was used to analyze the transcript profiles of genes regulated by bZIP TFs under  
189 study here during different developmental stages of *Arabidopsis* (Supplementary figure S1).  
190 Expression data revealed the higher and continuous expression of bZIP53 throughout the  
191 developmental stages of plant starting from seedling to seed maturation. Similarly, expressions of  
192 bZIP10 and bZIP25 were also observed that overlaps with bZIP53 expression. The expression of  
193 target genes of bZIP53, bZIP10, and bZIP25 namely, *2S2*, *LEA76*, *ASNI*, *CRA1*, and *CRU*  
194 increased during seed development and maturation (Supplementary figure S1). However,  
195 expression of *ProDH*, a direct target gene of bZIP53 was found to be higher in the mid stage of  
196 development, which eventually decreased during the seed maturation (Weltmeier et al. 2006). bZIP  
197 TFs like bZIP39 and bZIP72, which do not form heterodimer with bZIP53 and its dimerizing  
198 partners are also involved in the seed development and maturation (Alonso et al. 2009; Belmonte  
199 et al. 2013; Bensmihen et al. 2005; Jain et al. 2018; Jain et al. 2017; Le et al. 2010). *bZIP72* has a  
200 profound expression in the cotyledon while *bZIP39* (*ABI5*) was found in the embryonic part of  
201 seed (Belmonte et al. 2013; Le et al. 2010). Although, *bZIP39* showed higher expression in the  
202 later stage of seed development and maturation but the target gene SHB-1 was downregulated in  
203 the corresponding phase (Cheng et al. 2014). This emphasizes that bZIP39 is also involved in other  
204 biological process and can heterodimerizes with other bZIP TFs and participate in seed  
205 development and maturation.  
206 To gain an insight on the impact of A-ZIP53 over the expression of corresponding genes of target  
207 TFs including bZIP53, bZIP10, and bZIP25 (Lam et al. 2003; Weirauch et al. 2014; Weltmeier et

208 al. 2006) transgenic *lines* were subjected to gene expression analysis. qRT-PCR was used to  
209 analyze the expression of seven target genes (*2S2*, *CRU*, *LEA76*, *ProDH*, *ASNI*, *CRA1*, and  
210 *HSDI*), and a non-target gene (*SHB-1*) (Alonso et al. 2009; Cheng et al. 2014; Weirauch et al.  
211 2014). Leaves of the transgenic lines from the T-1 generation and immature siliques and seeds  
212 from T-2 generation were taken for the gene expression analysis (Figure 4A and 4B). The  
213 expression of *bZIP53* increased several folds in transgenic lines compared to the wild type (Figure  
214 4). It could be to compensate the requirement of *bZIP53* in transgenic, which is not available due  
215 to heterodimerization with A-ZIP53. The expression of target genes of *bZIP53*, *bZIP10*, and  
216 *bZIP25* including *CRU*, *ASNI*, *CRA*, and *HSDI* were downregulated in both generations (Figure  
217 4A and 4B). The expression of seed storage albumin (*2S2*) and late embryogenesis accumulating  
218 76 (*LEA76*) were not observed in the T-1 generation (Figure 4A) whereas both genes were  
219 downregulated in the T-2 generation (Figure 4B). The expression of *ProDH*, which is a direct  
220 target of *bZIP53* is higher in the T-1 generation while expressed less in the T-2 generation (Figure  
221 4A and Figure 4B) (Weltmeier et al. 2006). Thus, it could be inferred that, several fold higher  
222 expression of *bZIP53* might overcome the inhibitory effect of the A-ZIP53 and led to the higher  
223 expression of the *ProDH*. Previously, we demonstrated the specificity of the A-ZIP53 and showed  
224 it does not heterodimerize with *bZIP39* and *bZIP72* in vitro (Jain P et al. 2017). The higher  
225 expression of the *SHB-1*, a direct target of *bZIP39* confirmed the specificity of A-ZIP53. It shows  
226 the specificity and efficacy of DN protein to regulate the redundant behavior of target *bZIPs*.

### 227 **Varied reproductive phase parameters of transgenics**

228 To investigate the effect of A-ZIP53 on the reproductive phase of plants, A-ZIP53 expressing  
229 plants were studied together with the mutants of *bZIP53*, *bZIP10*, and *bZIP25* and wild type  
230 *Arabidopsis* (Supplementary Figure S2). *bZIP10* and *bZIP25* are reported to be involved in early  
231 stages of seed development (Lara et al. 2003) while the role of *bZIP53* is reported in the later  
232 stages of seed maturation (Alonso et al. 2009). A transgenic line, which has lower expression of  
233 A-ZIP53 was used for further analysis. Initially, this transgenic line has delayed growth like its  
234 predecessor and has lesser rosette diameter compared to mutants of *bZIP53*, *bZIP10*, *bZIP25*, and  
235 wild type (Supplementary Figure S2F) but later no significant differences were observed in plant  
236 height, growth, and leaves compared to mutants and wild type plants. Immature siliques and seeds  
237 of transgenic were subjected for qRT-PCR that showed the lower expression of genes involved in



238 seed development and maturation (Supplementary Figure S2G). The expression of *bZIP53* was  
239 many fold higher compared to the wild type. A significant higher expression of the *HSD1* and  
240 *bZIP39* also observed in the A-ZIP53 expressing transgenic lines.

241 Transgenic plants were analyzed for phenotypic variation including developed flower, silique, and  
242 mature seed compared to mutants of the *bZIP53*, *bZIP10*, *bZIP25*, and wild type *Arabidopsis*.  
243 Transgenics has reduced flower size compared to the wild type and mutants of bZIPs while flower  
244 development was like wild type (Figure 5A). Significant differences between flower of transgenics  
245 and mutant of *bzip10* and *bzip25* were observed but no significant difference were seen compared  
246 to *bzip53* mutant (Figure 5). The diameter of transgenic flower was significantly less compared to  
247 wild type and mutants of *bzip10* and *bzip25* (Figure 5B). Furthermore, transgenic has smaller  
248 siliques compared to the wild type and mutants (Figure 6A and 6B) and number of siliques per 0.5  
249 gm of weight is more compared to wild type (Figure 6C). Seeds of transgenic were small and  
250 shriveled (Figure 7A and Figure 7B). The seed weight of mutants and transgenics was less  
251 compared to the wild type (Supplementary figure S3). Small flower size, shorter silique length,  
252 and lesser number of seeds represents the impact of *A-ZIP53* on reproductive and seed  
253 development stage of the plant. Additionally, the length and width of seeds were significantly less  
254 compared to wild type *Arabidopsis* (Figure 7A and 7B). These results signify the effect of A-ZIP53  
255 on the functioning of *bZIP53* and its heterodimerizing partners, which are involved in seed  
256 development and maturation.

257

### 258 **A-ZIP53 restrict the expression of seed-specific genes**

259 To understand the transcriptome dynamic in the A-ZIP53 expressing plants compared to the wild  
260 type, RNA-seq analysis was performed. High quality reads were mapped on reference genome of  
261 *Arabidopsis thaliana*, which ranged from 90 % to 92 %. Two biological replicates were observed  
262 to understand the effect of A-ZIP53. The transcriptome data revealed 1029 differentially expressed  
263 genes (DEG) in which 71.62 % (737 out of 1029) were upregulated compared to 28.38 % (292 out  
264 of 1029) were downregulated genes (Figure 8) in A-ZIP53 expressing transgenic plants.

265 The assembled data was functionally categorized using the agriGO gene ontology (GO)  
266 tool (Figure 7). 20,764 unique transcripts, with the FDR of 0.05 were examined with the GO tool.  
267 The knocking down of *bZIP53* and its heterodimerizing partners have a profound effect on the

268 expression of corresponding genes. Down regulated transcripts were categorized into GO terms  
269 that participate into biological, cellular, and molecular functions (Supplementary Table S4). Most  
270 of the downregulated GO terms were identified to be related to genes, which are involved in  
271 gamete formation, seed development, seed maturation, seed storage protein synthesis,  
272 reproduction, and other biological processes. 48.8% genes in the biological, 20.8% in the cellular,  
273 and 32.2% genes involved in the molecular functions have been identified (Figure 9). Genes  
274 related to developmental process, hormone metabolism, and DNA binding transcription factor s  
275 activities were down regulated (Figure 9), which suggests the A-ZIP53 role inthe development  
276 related pathway.

277 The lower expression of genes related to gamete and seed development pathway including Late  
278 embryogenesis abundant protein (LEA) family, ECA1 gametogenesis related family protein,  
279 maternally expressed family protein, seed storage 2S albumin superfamily protein and others substantiate  
280 the A-ZIP53 effect on the target genes. Highlighting the redundant behaviour of TFs, genes involved in  
281 stress including salt stress are also found to be differentially expressed in A-ZIP53 expressing transgenic  
282 plants.

### 283 **Decoding of target genes and regulatory network**

284 Data generated from this study has helped to identify the putative target genes of *bZIP53* and its  
285 dimeric partners involved in regulating seed storage protein, gamete development, transcription  
286 factors, and both biotic and abiotic stresses.

287 DN protein A-ZIP53 has served to capture different proteins, which might act synergistically in  
288 different biological process like correlation between hormone signaling and TFs binding. One such  
289 example is bHLH-MYB complex in jasmonic acid -mediated stamen development and seed  
290 production (Qi et al. 2015). Transcriptome data revealed the higher expression of bHLH and MYB  
291 genes, which might be to balance the hinderance in function of other TFs including bZIPs. A-  
292 ZIP53 expressing transgenics have a retarded growth and small flower and seed phenotype. It  
293 might be due to the DN interferes with function of other regulating TFs like AGL100 (Bemer et  
294 al. 2010), MYB24 (Qi et al. 2015), ARF4 (Liu et al. 2018), and bZIP53 (Alonso et al. 2009) in an  
295 indirect manner, which might be working synergistically in flower development, gamete  
296 formation, and seed development. Disturbing the action of one TFs eventually imbalances the  
297 whole complex transcriptional machinery. Decipher the complex gene regulatory machinery

298 governed by other unknown factors through DN protein is helpful that not be possible using other  
299 loss of function mutation techniques.

300 The analysis of transcriptome revealed the complex combinatorial network of TFs including bZIPs  
301 (bZIP1 and bZIP53), MYB (MYB2, MYB19, MYB24, MYB27, MYB35, MYB51, and MYB59),  
302 MADS (AGL100), ARF (ARF4), and WRKY (WRKY6, WRKY15, WRKY28, WRKY33,  
303 WRKY47, WRKY48, WRKY66, and WRKY75), which might be working in a combinatorial  
304 fashion in stress and seed development.

### 305 **Possible targets of A-ZIP53 during seed maturation:**

306 Previous study by Alonso et al., 2009 showed that bZIP53 is a key regulator for seed maturation  
307 that can form heterotypic interaction with bZIP10 and bZIP25 (Alonso et al. 2009). However other  
308 bZIPs are also reported to be involved in seed development and maturation, including bZIP39  
309 (Bensmihen et al. 2005; Cheng et al. 2014; Dekkers et al. 2016). bZIP39 is also involved in floral  
310 transition (Wang et al. 2013), which signifies the functional redundancy like bZIP53 (Alonso et  
311 al. 2009; Dietrich et al. 2011; Hartmann et al. 2015). Functional redundancy of bZIP depends on  
312 the different dimerizing partner selection.

313 Our finding showed that A-ZIP53 can form the heterotypic interaction with the bZIP53, bZIP10,  
314 and bZIP25 *in vitro* and *in vivo* (Jain et al. 2018; Jain et al. 2017). In order to know other  
315 heterodimerizing partners of A-ZIP53, whole protein extract from immature siliques, immature  
316 seeds, and leaves were subjected to the immunoprecipitation followed by the mass-spectrometry  
317 (IP-nano LC-MS/MS (Material and Methods). bZIP proteins that were identified in more than one  
318 sample with at least one proteotypic peptide were considered as a high confidence candidate. Eight  
319 bZIP TFs (bZIP14, bZIP17, bZIP19, bZIP23, bZIP29, bZIP33, bZIP34, and bZIP69) were found  
320 in the study, which could be the interacting partners of the bZIP53 or A-ZIP53 (Table I). The  
321 similarity between the bZIPs (bZIP29, bZIP33, and bZIP67) precipitated from both samples  
322 confirm the efficacy and effectivity of A-ZIP53. In addition, to confirm the dimeric specificity of  
323 A-ZIP53 with target bZIPs, the total protein soup of wild-type Arabidopsis was incubated with  
324 pure protein A-ZIP53 followed by IP-MS. The annotated peptides were related to bZIP33, bZIP29,  
325 and bZIP53, which confirms the precipitation of similar bZIPs in all samples and efficacy of A-  
326 ZIP53. Amino acid sequences of immunoprecipitated bZIPs and their propensities to form dimeric  
327 interaction with bZIP53/A-ZIP53 also analyzed (Supplementary figure S5, S6, and S7). Charged

328 amino acids at g and e' positions in the leucine zipper forms an interhelical  $g \leftrightarrow e'$  (Jain et al.  
329 2017). The parameter was used to quantify the putative interactions between immunoprecipiated  
330 bZIPs with bZIP53 and A-ZIP53. Immunoprecipitated bZIPs have more putative attractive  
331 heterodimeric interactions with bZIP53 and A-ZIP53 except bZIP29 and bZIP33, which are  
332 common for all samples and more repulsive interhelical  $g \leftrightarrow e'$  interactions (4 for each)  
333 (Supplementary Figure S6B and S7B). It might be that these are the part of a novel interacting  
334 pathway involved in different developmental process.

### 335 **A-ZIP53 inhibits the DNA binding of target bZIPs in the transient transfection using** 336 **Arabidopsis protoplast**

337 Transient transfection with the Arabidopsis protoplast was used to probe the affectivity of A-ZIP53  
338 against target bZIPs identified by the IP-MS. For transfections, construct of 2S2 promoter which  
339 regulates the expression of GUS was co transformed with effector plasmids (*A-ZIP53*, and other  
340 bZIPs (*bZIP14*, *bZIP17*, *bZIP19*, *bZIP29*, *bZIP34*, *bZIP53*, and *bZIP69*) and control plasmid  
341 (NAN), which were under the control of 35S promoter (Alonso et al. 2009; Rishi et al. 2004;  
342 Weltmeier et al. 2009). A higher GUS/NAN activity was observed in the co-transfections of when  
343 co- transformed with the bZIPs plasmids (*bZIP53|bZIP69*). It shows a positive heterodimeric  
344 interaction between bZIP53 and bZIP69 in the presence of DNA. However, A-ZIP53, which is a  
345 DN of bZIP53 heterodimerizes and inhibit the DNA binding of target bZIPs, which results in  
346 reduced GUS/NAN activity, which shows the other mode of interaction between  
347 immunoprecipitated bZIPs and A-ZIP53 (Figure 10).

### 348 **Discussion**

349 Various studies in the past have been done to decipher the molecular network for seed maturation  
350 however, less attention has been paid to regulate the redundant behavior of transcription factors.  
351 In this study, we have established the molecular worthiness of a novel designed dominant negative  
352 protein A-ZIP53 to regulate the dimerization of target bZIP transcription factors. A-ZIP53 is  
353 previously reported to form heterotypic interaction with target bZIP TFs i.e., bZIP53, bZIP10, and  
354 bZIP25, which are involved in seed maturation (Alonso et al. 2009; Jain et al. 2017). The  
355 overexpressed A-ZIP53 specifically form a heterotypic interaction with target bZIP proteins and

356 hinder their DNA binding activity. The p35S:A-ZIP53 plants have retarded growth and produces  
357 unviable seeds, indicating the efficacy of designed protein against target bZIP TFs.  
358 Earlier, we have functionally validated A-ZIP53 and its derivatives against target bZIP TFs in  
359 *Arabidopsis* (Jain et al. 2018; Jain et al. 2017). A-ZIP53 has a dimerization domain of bZIP53 and  
360 a designed polyglutamic rich acidic extension at its N-terminal. The design strategy has been  
361 adapted from the idea that the acidic extension mimics DNA and provide an alternate binding site  
362 for target bZIP TFs (Krylov et al. 1995). This acidic extension stretches the leucine zipper  
363 extension to A-ZIP53|bZIP heterodimer. The functional significance was examined by constitutive  
364 expression of *A-ZIP53* under control of CaMV35S promoter. *Arabidopsis* plants expressing a  
365 novel A-ZIP53 partially mimics the phenotype of bZIP53 overexpressing lines, with a dwarf and  
366 delayed bolting phenotype (Alonso et al. 2009). The differential expression of A-ZIP53 confirms  
367 the efficacy and potent effect on plants (Figure 1). A-ZIP53 has a dimerization domain of bZIP53  
368 that belongs to class S1 bZIP TF (Jakoby et al. 2002). Earlier reports confirmed the putative  
369 heterotypic interaction between bZIPs of group S1 and group C namely bZIP9, bZIP10, bZIP25,  
370 bZIP63, and others using yeast two hybrid and *in vitro* DNA binding assays, which have a  
371 prominent role in growth and development (Alonso et al. 2009; Dietrich et al. 2011; Dröge-Laser  
372 et al. 2018; Ehlert et al. 2006; Hartmann et al. 2015; Kang et al. 2010; Weltmeier et al. 2006). The  
373 network of class C/S1 bZIPs is less disordered and have heptads with a high helical tendency that  
374 favors their dimerization (Deppmann et al. 2006; Jakoby et al. 2002). Further, heterodimers of  
375 class C/S1 bZIPs have lesser stabilizing forces resulting in the weaker stability (Llorca et al. 2014).  
376 It prompted us to imply the DN protein A-ZIP53 that efficiently and stably forms a heterotypic  
377 interaction with the class C/S1 bZIP TFs. The designed acidic extension prolongs the dimerization  
378 interface into the DNA binding region and provides two magnitude higher stability to the A-  
379 ZIP53|bZIP heterodimer complex (Jain et al. 2017). Excess of A-ZIP53 extends its specific  
380 dimerization and tendency to target bZIPs, which is less abundant. It makes A-ZIP53 an effective  
381 competitor in a stoichiometric environment.

382 It was shown previously that the O2, bZIP10, and bZIP25 related to the group C bZIPs  
383 interacts with ABI3 during seed maturation and bZIP53 enhanced the activation of the heterodimer  
384 complex in transient transfection assay (Alonso et al. 2009; Ehlert et al. 2006; Schmidt et al. 1990;  
385 Weltmeier et al. 2009). The specificity of A-ZIP53 against class C/S1 bZIPs was validated by

386 transient transfections, which showed the efficacy of DNAs to overcome biological redundancy  
387 (Sato et al. 2004; Weltmeier et al. 2006) and stresses (Dietrich et al. 2011; Hartmann et al. 2015).

388 Redundant behavior of bZIP TFs is due to their interacting partners and A-ZIP53 has an  
389 edge to decipher them. It is reported that bZIPs have strong transactivation properties and the  
390 heterotypic interaction with the promiscuous DN like A-ZIP53 may deter their potential binding  
391 to cognate DNA binding sites. These DNA binding sites can play an active role for the cooperative  
392 interactions between bZIP TFs (Jain et al. 2017; Jolma et al. 2013). These can be varied for the  
393 individual TFs and it may be due to the different heterodimerizing partners like the bZIP53 TF,  
394 which has affinity to the G-box (ACACGTGAT) and the C-box (CCACGTCGC) as shown by the  
395 Protein-DNA binding assays and the DAP-seq (Supplementary Table S1) (Alonso et al. 2009;  
396 Ezcurra et al. 2000; Jain et al. 2017; O'Malley et al. 2016; Pedrotti et al. 2018). DNA mimicking  
397 acidic extension of A-ZIP53 provides an alternate binding site for bZIP TFs and hinders their  
398 interaction with partner bZIPs and DNA (Jain et al. 2017). A-ZIP53 has more tendency to interact  
399 specifically with target bZIP proteins compared to DNA ( $4.6 \text{ kcal mol}^{-1} \text{ dimer}^{-1}$ ) (Jain et al. 2017).  
400 It deters the function of target bZIP TFs and regulates their redundant behavior by forming  
401 heterodimer like the *bZIP53*, which is a direct target of *A-ZIP53* (Alonso et al. 2009; Hartmann et  
402 al. 2015; Jain et al. 2018; Jain et al. 2017). *bZIP53* expression is not restricted to seeds and can be  
403 observed in vegetative tissues (Supplementary figure S1). Arresting its heterodimerization results  
404 in the abnormal phenotype like retarded growth and shriveled seeds (Figure 2B and Figure  
405 2C) (Alonso et al. 2009; Dietrich et al. 2011; Hartmann et al. 2015).

406 Expression of genes including *ProDH*, *ASN1* are reported to be directly regulated by *bZIP53*  
407 (Baena-González et al. 2007; Hanson et al. 2008; Sato et al. 2004; Weltmeier et al. 2006). *ProDH*  
408 is involved in hypo-osmolarity response and *ASN1* is known to enhance seed storage protein (SSP)  
409 content and nitrogen status of food (Lam et al. 2003; Sato et al. 2004; Weltmeier et al.  
410 2006). Studies done on bZIP53 overexpressing transgenic lines have revealed higher expression  
411 of *MAT* and *LEA* genes like *2S2*, *CRU3*, *CRA1*, *HSD1*, *LEA76*, *ProDH*, and the *ASN1* (Alonso et  
412 al. 2009; Baena-González et al. 2007; Lam et al. 2003; Sato et al. 2004; Weltmeier et al. 2006).  
413 Significantly lesser expression of *MAT* and *LEA* genes was observed in the immature siliques and  
414 seed of the T-1 and T-2 generation of the A-ZIP53 expressing transgenic lines, which could be a  
415 reason for the abnormal and shriveled seeds phenotype (Figure 7A and 7B) (Tunnacliffe and Wise

416 2007). A-ZIP53 regulates the C/S1 network and deter their interaction with the cognate DNA  
417 binding sites. A-ZIP53 is highly specific to its target as no such negative effect was observed on  
418 the expression of bZIP39 and its target gene *SHB-1* (Cheng et al. 2014; Jain et al. 2017). The higher  
419 expression of *bZIP53* was observed in the transgenic lines of the T-1 and T-2 generation, which  
420 could be to compensate the unavailability of the *bZIP53* to other dimeric partners. The effects of  
421 reproductive parameters were subjected for the analysis..

422 It was observed that A-ZIP53 expressing transgenic have significantly smaller flower,  
423 shorter siliques, and shriveled seeds compared to wild type ( $p < 0.01$ ), mutants of *bZIP53*, *bZIP10*,  
424 and *bZIP25* (Figure 5, Figure 6, and Figure 7). Phenotypic examination of the A-ZIP53 expressing  
425 T-3 transgenic lines have similar growth as wild type and mutants but have lower expression of  
426 *MAT* and *LEA* genes. In seed maturation, ABI3 is an important regulator that interacts with the  
427 bZIP10 and bZIP25. A ternary complex was reported between the ABI3, bZIP10, bZIP25, and  
428 bZIP53 is a key regulator in seed development and maturation (Alonso et al. 2009; Lara et al.  
429 2003). Expression of the A-ZIP53 could restrict the DNA binding of ternary complex and restrict  
430 the function of non-target protein.

431 Transcriptome analysis of A-ZIP53 expressing transgenic lines revealed the down  
432 regulation of multiple genes including the LEA ( $\log_2FC -7.45$ ) and 2S2 ( $-4.49$ ), that are known to  
433 be crucial for the seed development and maturation (Supplementary table 8). These results signify  
434 the efficacy of A-ZIP53 against target bZIPs regulating genes involved in seed development and  
435 maturation. Additionally, number of crucial genes have been identified in this study, which might  
436 be involved in the growth, development or seed maturation pathway targets to uncover the complex  
437 cascade of seed development and maturation.

438 Through systematic transcriptomic analysis, a broad map of genes effected by A-ZIP53  
439 has been discussed, which will help to uncover the complex cascade of seed development and  
440 maturation. These genes implicate in diverse processes including biotic (*At1G19610*) (Ascencio-  
441 Ibáñez et al. 2008), and abiotic (*At5g12030*) (Lee and Seo 2019), DNA binding transcription factor  
442 (*MYB24*) (Qi et al. 2015), *AGL100* (Bemer et al. 2010), *WRKY33* (Wang et al. 2020) (and others),  
443 hormone signaling (Auxin-responsive GH3 family protein (Zheng et al. 2016), seed development  
444 and maturation (Late embryogenesis abundant protein (LEA) family protein (Candat et al. 2014).

445           Given the other interacting partners of bZIP TFs, a varied expression of cysteine rich  
446 peptides (CRPs) has been also observed. CRPs are reported in various biological processes,  
447 including mammalian and plant defenses, stress response, development and reproduction, and  
448 cell–cell communication (Marshall et al. 2011; Ostrowski and Kowalczyk 2015). They can form  
449 dimeric interactions (homo- or hetero-) and regulate diverse biological processes. The higher  
450 expression of CRPs in A-ZIP53 expressing plant signifies the relation between higher expression  
451 of bZIP protein and CRPs. A speculation can be made about a putative interaction between CRPs  
452 and bZIPs under salt stress as CRP (Xu et al. 2018) and bZIP1 or bZIP53 (Hartmann et al. 2015)  
453 both have a potential role in salt mediated stress. The lower expression of CRP (*AtPCP-Bδ-*  
454 *At2g16505*) was also observed, which regulates the pollen tube growth. It signifies the A-ZIP53  
455 hinders the seed development pathway and have an effect on the post pollination events (Wang et  
456 al. 2017). The differential effect on the expression of CRPs, which might be a potential target of  
457 A-ZIP53 and eventually a possible heterodimeric partner of bZIP53 and other bZIPs has open a  
458 new-horizons about the molecular mechanism governed by bZIP TFs.

459           Immunoprecipitation followed by the mass spectrometry has confirmed the heterotypic  
460 interaction of A-ZIP53 with target bZIPs and its dimeric interacting partners (Table I). The  
461 precipitated bZIPs could be targeted in future to decipher the complex C/S1 or other novel cross  
462 network like B/I network (bZIP 17) (Jakoby et al. 2002). The transient transfection studies using  
463 protoplast confirmed the *in vivo* dimeric interaction between A-ZIP53 and target bZIPs (Figure  
464 10). These results validate the DNA binding of bZIPs as a potential molecular target for functional  
465 regulation.

466           Based on findings from this study, a working model suggesting regulation of DNA binding  
467 and heterotypic interactions of target bZIP TFs is proposed (Figure 11). The function of bZIP53  
468 in seed maturation depends on its heterodimeric partners bZIP10 and bZIP25. Ectopic expression  
469 of the bZIP53 leads to higher expression of genes involved in seed development and maturation.  
470 Designed novel DN protein A-ZIP53 could be used to restrict the DNA binding and heterotypic  
471 interaction of target bZIPs and inhibit their function.

472           Moreover, to our knowledge this is the first time the efficacy of the *A-ZIP53* is reported to  
473 understand and regulate the redundant behaviour of bZIP TFs in plants. While there are numerous



474 techniques for loss of function studies like CRISPR-cas9 or RNAi, but their potential is limited  
475 to understand the redundancy. We therefore believe that the application of dominant negative  
476 proteins like A-ZIP53 could play a substantial role to understand the redundancy and unzip the  
477 complex cascade of signaling network. These interacting network of downstream signaling  
478 pathway could be a subject for further studies.

## 479 **Material and Methods**

### 480 **Plant Material:**

481 Col -0 accession of *Arabidopsis thaliana* was used as a wild type in the present study. Seeds were  
482 surface sterilized and kept for stratification in dark at 4 °C for 2-3 days on half strength MS- agar  
483 (Millipore Sigma) plates. Seeds of mutants of *bzip10*, *bzip25*, and *bZIP53* were obtained from  
484 TAIR and germinated on the half strength MS agar plate. For germination, seeds were transferred  
485 in growth chamber under controlled condition of 16-h-light/8-h-dark photoperiod cycle, 22°C  
486 temperature, 150 to 180  $\mu\text{mol m}^{-2} \text{s}^{-1}$  light intensity, and 60% relative humidity. Three weeks old  
487 plants were used for the measurement of rosette diameter, and six weeks old mature plant were  
488 used for flower and silique size.

### 489 **Construct preparation and Plant Transformation:**

490 A-ZIP53 with the T-7 tag was amplified using the corresponding template and cloned as NdeI –  
491 EcoRI double digested fragment under the CaMV35S promoter in the pRI101AN vector.  
492 To generate the *A-ZIP53* expressing transgenic lines, *Arabidopsis* (Col-0) plants were transformed  
493 with the floral dip method using *Agrobacterium tumefaciens* strain GV3101. Dipped plants were  
494 grown in a growth chamber under the standard growth conditions (22 °C under 16-h light/8-h dark  
495 photoperiod (150–180  $\mu\text{mol m}^{-2} \text{s}^{-2}$ ). T1 transformed plants were selected on the 50  $\mu\text{g/ml}$   
496 kanamycin containing MS agar plate with 1 % sucrose for 7-10 days. Selected lines screened for  
497 the next generation and subjected for Western blotting.

### 498 **Protoplast isolation and transient transfection assay using BY-2 tobacco cell line and** 499 *Arabidopsis*

#### 500 **Protoplast isolation from BY-2 tobacco cell line**

501 For protoplast isolation, BY-2 cell line suspension was centrifuged at 100 g for 5 minutes and 15  
502 ml of packed cell volume was resuspended into 50 ml of protoplast isolation solution (7.4 gm/L

503 CaCl<sub>2</sub>·2H<sub>2</sub>O, 1 gm/L NaOAc (anhydrous), and 45 gm/L mannitol supplemented with 1.2 %  
504 cellulose R10 (Millipore Sigma) and 0.6 % Macerozyme (Millipore Sigma), pH 5.7, filter sterilized  
505 with 0.22 µm filter). Suspension culture was transferred into three petriplate and incubated in dark  
506 with gentle shaking (100 rpm) at room temperature for 3-4 hrs. Protoplasts were centrifuged at  
507 250Xg for 5 minutes, collected, and washed twice with protoplast isolation solution and  
508 centrifuged at 100 rpm for 1 minute. Pellet was resuspended in 10 ml of floating solution (99 mg/L  
509 myo-inositol, 2.88 gm/L L-proline, 100 mg/L enzymatic casein hydrolysate, 102.6 gm/L sucrose,  
510 97.6 mg/L MES buffer, 4.4 gm/L MS salts, 1 mg/L thiamine-HCl, 370 mg/L KH<sub>2</sub>PO<sub>4</sub>, pH 5.7) and  
511 centrifuged at 250Xg for 10 minutes. Isolated protoplast on the top of solution were transferred to  
512 a new tube and 10 ml of W5 solution (154 mM NaCl, 125 mM CaCl<sub>2</sub>, 5 mM KCl, 2 mM MES,  
513 pH 5.7) was added. The protoplast solution was centrifuged at 250Xg for 5 minutes. Number of  
514 protoplast was adjusted to 10<sup>6</sup>/ml using W5 solution and incubated on ice for 30 minutes.  
515 Protoplasts were again centrifuged at 250X g for 2 minutes and suspended in MMg solution (0.6  
516 M mannitol, 15 mM MgCl<sub>2</sub>, 4 mM MES, pH 5.7) to obtain 10<sup>6</sup> cells (Lee et al. 2008).

#### 517 **Transient transfection of *Nicotiana tabacum* By-2 cell line:**

518 Constructs of effector plasmid, 9 µg (Camv35S: bZIP10, Camv35S: bZIP25, Camv35S: bZIP53,  
519 and Camv35S:A-ZIP53), reporter plasmid, 9 µg (2S2:GUS), and normalization vector, 1µg  
520 (CaMV35S: NAN) were mixed with 100 µl of protoplast (2X10<sup>4</sup> protoplasts) and mixed gently.  
521 110 µl of PEG solution (Prepare 20–40% (wt/vol) PEG3500 in ddH<sub>2</sub>O containing 0.2 M mannitol  
522 and 100 mM CaCl<sub>2</sub>) was added. Transfection mixture was incubated at room temperature for 15  
523 minutes. Mixture was diluted with 400-440 µl of W5 solution, gently inverted to stop the  
524 transfection process. Protoplasts were resuspended with 1 ml of WI solution (4 mM MES – pH  
525 5.7, 0.5 M mannitol, and 20 mM NaCl, it can be stored at room temperature) and divided into six  
526 different tube. Protoplasts were incubated in dark at room temperature (20 °C – 25 °C) for 16 –18  
527 hours. Protoplast suspension was centrifuged at 100x g for 2 minutes at room temperature.  
528 Supernatant was removed and samples were kept in -80 °C for further analysis (Yoo et al. 2007).  
529 GUS/NAN ratio was quantified as described earlier (Alonso et al. 2009).

#### 530 **Protoplast isolation and transient transfection using *Arabidopsis* leaves**

531 Protoplasts were isolated as described earlier (Jain et al. 2017). Four weeks old Col-0 plants with  
532 well expanded healthy leaves were selected for protoplast isolation. 0.5 mm – 1 mm part of leaves

533 were cut from the middle with sharp razor blade. For  $10^6$  -  $10^7$  / gm fresh protoplast approximately  
534 40 - 50 leaves are required. Cut sections were digested in 5 – 10 ml of enzyme solution {20 mM  
535 MES (pH 5.7) containing 1.5% (wt/vol) cellulase (sigma), 0.4% (wt/vol) macerozyme (sigma), 0.4  
536 M mannitol, and 20 mM KCl. Solution was heated at 55 °C for 10 minutes to inactivate the DNase  
537 and protease. Cool it at room temperature and add 10 mM  $\text{CaCl}_2$ , 1–5 mM  $\beta$ -mercaptoethanol  
538 (optional), and 0.1% BSA (Final enzyme solution should be clear light brown). Leaves were  
539 vacuum infiltrated with the final enzyme solution for 30 minutes in dark using desiccator.  
540 Digestion was continued by putting the leaves in dark for 3 -4 hours at room temperature. The  
541 green color of solution resembles the release of protoplasts. Number of released protoplasts were  
542 checked under the microscope. Enzyme solution was diluted with equal volume of W5 solution (2  
543 mM MES (pH 5.7) containing 154 mM NaCl, 125 mM  $\text{CaCl}_2$ , and 5 mM KCl) that can be stored  
544 at room temperature. Enzyme solution was filtered with muslin cloth and centrifuged at 100 g in a  
545 30 ml round bottomed tube for 1 minute. Supernatant was removed and pellet was re suspended at  
546  $2 \times 10^5$  cells in W5 solution. Protoplast were kept in ice for 30 minutes and allowed to settle. W5  
547 solution was removed without disturbing the settled protoplast. Protoplast were resuspended at  $2$   
548  $\times 10^5$  /ml in MMG solution {4 mM MES (pH 5.7) containing 0.4 M mannitol and 15 mM  $\text{MgCl}_2$ .  
549 The prepared MMG solution can be stored at room temperature (Yoo et al. 2007).  
550 To confirm the heterodimeric interaction between the *A-ZIP53* and target proteins, constructs of  
551 effector, reporter, and normalization vector were transformed and subjected for the GUS-NAN  
552 activity as described earlier (Alonso et al. 2009; Jain et al. 2017).

### 553 **RNA extraction and Illumina sequencing**

554 Total RNA was extracted from the wild type and *A-ZIP53* expressing *Arabidopsis* using ZR plant  
555 RNA miniprep (ZYMO Research) as per manufactures instruction. The quality and quantity of  
556 RNA was checked on 1 % denaturing RNA agarose gel and NanoDrop/Qubit fluorometer,  
557 respectively. The RNA-seq paired end sequencing library were prepared from the QC passed RNA  
558 samples using illumina TrueSeq stranded mRNA sample preparation kit. Briefly, mRNA was  
559 enriched from the total RNA using poly-T attached magnetic beads, followed by enzymatic  
560 fragmentation, 1<sup>st</sup> strand cDNA conversion using Superscript II and Act-D mix to facilitate RNA  
561 dependent synthesis. The 1<sup>st</sup> strand cDNA was then synthesized to second strand using second

562 strand mix. The ds cDNA was then purified using Ampure XP beads followed by A-tailing, adapter  
563 ligation, and then enriched by limited number of PCR cycles.

#### 564 **Cluster generation and Sequencing**

565 After obtaining the Qubit concentration for the libraries and the mean peak size from Agilent Tape  
566 Station profile, the PE illumine libraries were loaded onto NextSeq 500 for cluster generation and  
567 sequencing. Paired-End sequencing allows the template fragments to be sequenced in both the  
568 forward and reverse directions on NextSeq500. The adaptors were designed to allow selective  
569 cleavage of forward strand after re-synthesis of reverse strand during sequencing. The copied  
570 reverse strand will then use to sequence from the opposite end of the fragment.

#### 571 **RNA seq analysis**

572 Adaptor trimming and quality trimming of the samples (wild-type and three biological replicates  
573 of the A-ZIP53 expressing transgenic) were performed using Trimmomatic- 0.35. The sequenced  
574 raw data was processed to obtain high quality clean reads using Trimmomatic to remove adaptor  
575 sequences, ambiguous reads (reads with unknow nucleotides “N” larger than 5%) and low-quality  
576 sequences (read with more than 10 % quality threshold (QV) <20 phred score). A minimum length  
577 of 50 nucleotide (after trimming) was applied. After removing the adaptor and low-quality  
578 sequences from the raw data, high quality sequences were obtained. This high quality paired-end  
579 reads were used for the referenced based read mapping. The high-quality reads were mapped on  
580 the reference genome of *Arabidopsis thaliana* using TopHat v2.1.1 with the default parameters.

#### 581 **Gene ontology (Go) and differential gene expression (DGE) analysis**

582 The DGE was carried out using cutdiff v1.3.0. Fold change (FC) values greater than zero wer  
583 considered as upregulated whereas less than zero as downregulated. P value threshold of 0.05 was  
584 used to filter statistically significant results. For GO analysis Singular Enrichment Analysis (SEA)  
585 of agri GO(<http://bioinfo.cau.edu.cn/agriGO/analysis.php>) was used. Hypergeometric tests with  
586 Hochberg FDRs (false discovery rates) were performed using the default parameters to adjust the  
587 P-value <0.05 for obtaining significant GO terms.

588

#### 589 **Quantitative real-time PCR (qRT-PCR)**

590 The differential gene expression was validated by qRT-PCR. Total RNA (2 µg) was isolated  
591 (Spectrum Plant Total RNA kit) from the leaves (T1 generation) and immature siliques (T2 and

592 T3 generation) from wild-type and A-ZIP53 expressing *Arabidopsis*. Contamination of genomic  
593 DNA was removed by the Turbo DNA-free kit (Invitrogen, ThermoFisher, USA).  
594 Later, cDNA was synthesized (Invitrogen Superscript® III Reverse Transcriptase) as per  
595 manufacturer's protocol. For qRT-PCR gene specific primers were used. The template  
596 concentration was 10-15 ng while the concentration of forward and reverse primer was 10 ng in  
597 SYBR select Master Mix (ABI). The PCR was performed using the ABI 7700 sequence detector  
598 (Applied Biosystems, USA) as per manufacturers instruction. Two biological and three technical  
599 experiments were taken for each experiment. Statistical analysis was done using Origin 6.1.

600

### 601 **Total protein extraction and Western blotting**

602 Total protein extract was prepared by grinding the 5 days old seedling grown in the long day  
603 conditions using the protein extraction buffer (50 mm Tris-HCl, pH 8, 150 mm NaCl, 1  
604 mm EDTA, pH 8.0, 1% SDS, 1 mM PMSF, 1 mM DTT, protease inhibitor) (Mair, 2015). Total  
605 protein was quantified using the Bradford assay method (Bradford 1976). Protein was separated on  
606 the 10 % SDS PAGE and transferred on the polyvinylidene difluoride (PVDF) membranes  
607 (Hybond™-P; GE Healthcare, Piscataway, NJ, USA) using the wet transfer method (1 hour, 100  
608 volt, 4 °C). Transferred blot was incubated in the blocking buffer (3 % skimmed milk in TBST  
609 buffer (20 mm Tris-HCl, pH 7.5, 200 mm NaCl and 0.1 % Tween 20) for 1 hour at the room  
610 temperature to inhibit the non-specific antibody interactions. For immunoblotting of *A-ZIP53* the  
611 blocked blot was incubated with the 1:5000 dilution of HRP labeled rat anti-T7 antibody (Thermo  
612 Scientific) at 4 °C overnight. The fluorescence signals were detected by the fluorescence imager  
613 using the SuperSignal™ West Pico PLUS Chemiluminescent Substrate (Thermo Scientific).

### 614 **Co-Immunoprecipitation of proteins in Transgenic *Arabidopsis***

615 Pull-down assay was used to extract the target proteins from mixture (cell lysate). For Co-IP of *A-*  
616 *ZIP53* from the protein extract of transgenic plants, antibodies targeting T7 tag were mixed with  
617 protein lysate in the protein extraction buffer. Mixture was kept at 4 °C for 2 hours. "Protein  
618 extracted" with T7 tag antibodies were incubated with protein A containing magnetic beads (Dyna  
619 beads, Thermo fisher) for 2 hours at 4 °C. Beads with immobilized antibodies were collected  
620 through magnetic separation rack (NEB). Beads were washed with protein extraction buffer for 1  
621 minute, washed beads were collected with magnets and washing was repeated. Final washing was

622 done with autoclave water for 1 minute. Beads with immobilized protein of interest were again  
623 collected and resuspended in 1× Laemmli sample buffer (32.9 mM Tris HCl (pH 6.8), 13.15 %  
624 glycerol, 1 % SDS, 0.01 % bromophenol blue, and 355 mM β mercaptoethanol), boiled at 95 °C  
625 for 5 minutes and centrifuged. Beads were collected with magnet and supernatant was separated  
626 on 15 % SDS PAGE.

627

### 628 **In-Gel digestion of immunoprecipitated proteins**

629 To check the identity of protein with mass spectrometry, the Coomassie stained gel was rinsed  
630 with water and bands were excised with the clean scalpel. Excised bands were chopped with the  
631 scalpel and washed with 40 mM ammonium bicarbonate (ABC, pH 8.5), and dried with the  
632 acetonitrile (ACN). Bands were gently agitated and again washed with the destaining solution for  
633 complete destaining. Destained gel pieces were incubated in 0.5 ml of 100 % ACN for 10-15  
634 minutes until gel pieces shrunk and become opaque. The liquid was discarded and gel pieces were  
635 incubated in the reduction solution (5 mM DTT, 40 mM ABC) at 60 °C for 5 minutes. DTT was  
636 washed off and the cysteine were alkylated using the alkylation solution (20 mM IAA in 40 mM  
637 ABC) for 10 minutes in dark at room temperature. Gel pieces were dehydrated with 100 % ACN  
638 and trypsinized using the sequencing grade trypsin (Sigma Chemical Co, USA) at a concentration  
639 of 10 ng/μl in 40 mM ABC and incubated overnight at 37 °C. The digestion was stopped by the  
640 addition of approximately 0.1 % of the formic acid with a incubation at 37 °C for 10 minutes.  
641 Tubes were spun and the supernatant was incubated with 100 μl of extraction buffer (5 % formic  
642 acid, 40 % ACN) for 10 minutes at room temperature. Tubes were again centrifuged and the  
643 supernatant was mixed with extraction buffer. The final extraction was carried out with the 100 %  
644 ACN by incubating at room temperature for 10 minutes. The supernatant was collected and dried  
645 using Speed Vac (Thermo fisher Scientific, USA). Trypsinized peptides were sequenced using the  
646 Triple TOF M 5600 mass spectrometer (AB Sciex Pte. Ltd., USA) attached with the Nano-LC  
647 (Eksigent Technologies Llc, USA). The dried trypsinized 0.1 μg of protein were resuspended in  
648 0.1 % formic acid. 10 μl of the sample was passed through the desalting trap column (Chrom-XP,  
649 C-18-CL-3μM, 350 μM X 0.5mm, Eksigent Technologies LLC., USA). After desalting peptides  
650 were separated on C18 matrix (3C-18-CL-120, 3 μM, 120A, 0.075 X 150 mm, Eksigent  
651 Technologies LLC., USA) before peptide sequencing. The eluents used were eluent A, degassed

652 ionized water with 0.1 % (v/v) formic acid, eluent B, 100 % acetonitrile (containing 0.1 % (v/v)  
653 formic acid with a linear gradient of 5-95 % for 120 mins with a flow rate of 300 nl/min. After  
654 separation peptides were subject to tandem mass (MS/MS) analysis. The Nano-LC was directly  
655 coupled to a Triple TOFM 5600 mass spectrometer, which was operated in an information  
656 dependent acquisition (IDA) mode. For IDA one full scan (m/z 350-1250) was followed by 8  
657 MS/MS scans and the electrospray voltage was set to 2500 V.

### 658 **3.2.64 Data interpretation**

659 Raw spectra for the peptide identification were interpreted using Protein Pilot 4.0 (ABsciex). The  
660 peptide spectra were searched against the *Arabidopsis thaliana* entries using uniprot database  
661 under following parameters: the peptide tolerance was set to 1 Da and MS/MS was set to 0.8 Da.  
662 Trypsin was selected as a protease.

663

### 664 **Legends:**

665 **Figure1** Constitutive expression of A-ZIP53 in wild-type *Arabidopsis thaliana*

666 **(A)** Schematic of Pro35S: A-ZIP53 construct as described in Materials and method. **(B)** Phenotype  
667 alternation and abnormal growth pattern of 12 weeks old transgenic *Arabidopsis* of T -1  
668 generation. **(C)** Differential expression of *A-ZIP53* in different lines of transgenic. Error bar  
669 represent ( $\pm$ ) mean and S.D of three biological replicates. The level of significance was calculated  
670 using oneway ANOVA. \*\* level of significance ( $P < .01$ ). Error bar indicates mean and S.D. of  
671 three biological replicates.

672 **Figure2 (A)** Western blot confirms the expression of A-ZIP53 in five days old seedling. **(B)**  
673 Phenotypic variation in the growth of four weeks old transgenic compared to wild type. **(C)**  
674 Differences in the growth of six weeks old transgenic and wild-type. **(D)** Variation in the silique  
675 and seeds of wild type and transgenic.

676 **Figure3** *A-ZIP53* hinders the DNA binding activity of target bZIPs in the transient transfection  
677 assay using *Arabidopsis* protoplast. **(A) Dose dependent Assay:** 9  $\mu$ g of bZIP53 and the indicated  
678 increasing molar eq of A-ZIP53 plasmids were co transformed into the protoplast. The y axis  
679 defined as relative GUS/NAN activity. **(B)** BY-2 cell line protoplasts were transformed with 9  $\mu$ g

680 of bZIPs (53, 10, and 25) with 2 molar eq of A-ZIP53. 35S:NAN used as an internal control  
681 plasmid (1  $\mu$ g). The Y axis represented as relative GUS/NAN activity (Alonso et al., 2009). Error  
682 bar represent ( $\pm$ ) mean and S.D of three replicates from three independent transfection. The level  
683 of significance was calculated using oneway ANOVA. \*\*\* level of significance ( $P < .01$ ). Error  
684 bar indicates mean and S.D. of three biological replicates.

685 **Figure 4** (A) qRT-PCR revealed the expression of bZIP53, bZIP39, target (2S2, LEA, CRU,  
686 ProDH, ASN1, CRA1, and HSD1) of *bZIP53* and non-target gene (SHB -1) from the leaves of  
687 four weeks old transgenic and immature siliques and seeds of six week old plants.

688 **Figure 5(A)** Differences between length and size of flowers of mutants (*bzip10*, *bzip25*, and  
689 *bZIP53*) and transgenic of six weeks old plant **(B)** Significant differences between length and  
690 width of transgenic and mutants compared to wild-type.

691 **Figure6 (A)** Silique size of transgenic were smaller compared to mutants and wild type. **(B)** Length  
692 and width of siliques were compared. Error bar represent  $\pm$ mean and SD of siliques (n = 8-12) **(C)**  
693 Number of siliques per 0.5 gm of silique weight were more in transgenics compared to wild type.  
694 ( $\pm$  mean and S.D. of three independent biological replicates).

695 **Figure7** Differences in the seed size of transgenic, wild type, and mutants (*bZIP53*, *bzip10*, and  
696 *bzip25*) **(A)** Representative pictures of wild type, mutants and transgenic seeds **(B)** Seed of  
697 transgenic are smaller size compared to mutants and wild type (Error bar represent  $\pm$ mean and SD  
698 of siliques (n = 25).

699 **Figure8** Differential expression of genes (DEG) based on analysis from two independent  
700 biological replicates of wild type and A-ZIP53 expressing transgenic.

701 **Figure9** Gene Ontology enrichment analysis (for downregulated genes w.r.t. upregulated genes)  
702 resulted in selection of large number of enriched classification terms. Similar in case of enriched  
703 GO terms in upregulated genes w.r.t. all genes in Arabidopsis. **A)** Genes involved in molecular  
704 function. **B)** Genes involved in cellular function. **C)** Genes involved in biological function

705 **Figure10** A-ZIP53 hinders the DNA binding of the bZIP14, bZIP17, bZIP19, bZIP29, bZIP34,  
706 bZIP53, and bZIP69 and their heterodimer with the bZIP53 mediated reporter gene activity in



707 transient transfection assay using Arabidopsis protoplasts. (A) Plasmid coding for bZIP53 can  
708 transactivate the *GUS* reporter gene under the control of the 2S2 promoter that contains a G-box  
709 binding site. \*\* represent  $P < 0.01$ . Protoplasts were co-transfected with plasmids coding for bZIPs  
710 and A-ZIP53. Transient expressions of A-ZIP53 inhibited the bZIPs-mediated *GUS* reporter  
711 activity in dose-dependent manner. Reporter activity was inhibited in the presence of 3 molar  
712 excess of A-ZIP53 plasmid suggesting that A-ZIP53 can compete with G-box for bZIPs binding.  
713 Error bars represent standard deviation of three independent experiments.

714 **Figure 11** Model for heterodimeric regulation of *bZIP53*, *bZIP10*, and *bZIP25* involved in the  
715 seed maturation by the designed dominant negative protein *A-ZIP53*.

716 **Table I** – Putative heterodimeric target bZIPs were revealed using IP-MS against the T7 antibody  
717 in the protein soup of A-ZIP53 expressing immature silique and seeds and proteins separated on  
718 15 % SDS PAGE.

## 719 ACKNOWLEDGMENTS

720 Authors are grateful to Prof. Wolfgang DrÖge-Laser, University of Würzburg, Germany for  
721 providing overexpressing full-length *bZIP53*, *bZIP10*, *bZIP25*, *bZIP14*, *bZIP17*, *bZIP19*, *bZIP29*,  
722 *bZIP34*, *bZIP69*, *NAN*, and *GUS* reporter gene plasmids. We thank Executive Director, NABI,  
723 Department of Biotechnology (DBT), and GOI for providing research facilities. PJ acknowledges  
724 the financial assistance in the form of JRF and SRF from DBT, GOI. We thank Shrikant Mantri  
725 and Gazaldeep Kaur for their help in proteome and transcriptome data analysis. This work is  
726 supported by the core grant of National Agri-Food Biotechnology Institute, Government of India  
727 (GOI).

## 728 AUTHOR CONTRIBUTION

729 **Conceptualization:** Prateek Jain and Vikas Rishi.

730 **Data curation:** Prateek Jain and Vikas Rishi.

731 **Formal analysis:** Prateek Jain.

732 **Methodology:** Prateek Jain.

733 **Project administration:** Prateek Jain and Vikas Rishi.

734 **Software:** Prateek Jain.

735 **Validation:** Prateek Jain.

736 **Writing:** original draft: Prateek Jain.

737 **Writing – review & editing:** Prateek Jain and Vikas Rishi.

738 **References:**

739 **Acharya, A., Ruvinov, S.B., Gal, J., Moll, J.R., and Vinson, C.** (2002). A heterodimerizing  
740 leucine zipper coiled coil system for examining the specificity of a position interactions:  
741 Amino acids I, V, L, N, A, and K. *Biochemistry*.

742 **Alonso, R., Oñate-Sánchez, L., Weltmeier, F., Ehlert, A., Diaz, I., Dietrich, K., Vicente-**  
743 **Carbajosa, J., and Dröge-Laser, W.** (2009). A pivotal role of the basic leucine zipper  
744 transcription factor bZIP53 in the regulation of Arabidopsis seed maturation gene expression  
745 based on heterodimerization and protein complex formation. *Plant Cell* **21**: 1747–1761.

746 **Avila, J.R., Lee, J.S., and Torii, K.U.** (2015). Co-Immunoprecipitation of Membrane-Bound  
747 Receptors.

748 **Baena-González, E., Rolland, F., Thevelein, J.M., and Sheen, J.** (2007). A central integrator of  
749 transcription networks in plant stress and energy signalling. *Nature* **448**: 938–42.

750 **Belmonte, M.F. et al.** (2013). Comprehensive developmental profiles of gene activity in regions  
751 and subregions of the Arabidopsis seed. *Proc. Natl. Acad. Sci. U. S. A.* **110**: E435-44.

752 **Bensmihen, S., Giraudat, J., and Parcy, F.** (2005). Characterization of three homologous basic  
753 leucine zipper transcription factors (bZIP) of the ABI5 family during Arabidopsis thaliana  
754 embryo maturation. *J. Exp. Bot.* **56**: 597–603.

755 **Boyes, D.C., Zayed, A.M., Ascenzi, R., Mccaskill, A.J., Hoffman, N.E., Davis, K.R., and**  
756 **Görlach, J.** (2001). Growth Stage-Based Phenotypic Analysis of Arabidopsis: A Model for  
757 High Throughput Functional Genomics in Plants. *Plant Cell* **13**: 1499–1510.

- 758 **Braybrook, S.A., Stone, S.L., Park, S., Bui, A.Q., Le, B.H., Fischer, R.L., Goldberg, R.B., and**  
759 **Harada, J.J.** (2006). Genes directly regulated by LEAFY COTYLEDON2 provide insight  
760 into the control of embryo maturation and somatic embryogenesis. *Proc. Natl. Acad. Sci. U.*  
761 *S. A.* **103**: 3468–73.
- 762 **Cheng, Z.J., Zhao, X.Y., Shao, X.X., Wang, F., Zhou, C., Liu, Y.G., Zhang, Y., and Zhang,**  
763 **X.S.** (2014). Abscisic acid regulates early seed development in Arabidopsis by ABI5-  
764 mediated transcription of SHORT HYPOCOTYL UNDER BLUE1. *Plant Cell* **26**: 1053–68.
- 765 **David W. Meinke, J. Michael Cherry, Caroline Dean, Steven D. Rounsley, M.K.** (1998).  
766 *Arabidopsis thaliana*: A Model Plant for Genome Analysis. *Science* (80-. ). **282**: 662–682.
- 767 **Dekkers, B.J.W., He, H., Hanson, J., Willems, L.A.J., Jamar, D.C.L., Cueff, G., Rajjou, L.,**  
768 **Hilhorst, H.W.M., and Bentsink, L.** (2016). The Arabidopsis Delay of Germination 1 gene  
769 affects Abscisic Acid Insensitive 5 (ABI5) expression and genetically interacts with ABI3  
770 during Arabidopsis seed development. *Plant J.* **85**: 451–465.
- 771 **Deppmann, C.D., Acharya, A., Rishi, V., Wobbes, B., Smekens, S., Taparowsky, E.J., and**  
772 **Vinson, C.** (2004). Dimerization specificity of all 67 BZIP motifs in Arabidopsis thaliana: A  
773 comparison to Homo sapiens BZIP motifs. *Nucleic Acids Res.*
- 774 **Dietrich, K., Weltmeier, F., Ehlert, A., Weiste, C., Stahl, M., Harter, K., and Dröge-Laser,**  
775 **W.** (2011). Heterodimers of the Arabidopsis transcription factors bZIP1 and bZIP53  
776 reprogram amino acid metabolism during low energy stress. *Plant Cell* **23**: 381–95.
- 777 **Ehlert, A., Weltmeier, F., Wang, X., Mayer, C.S., Smekens, S., Vicente-Carbajosa, J., and**  
778 **Dröge-Laser, W.** (2006). Two-hybrid protein-protein interaction analysis in Arabidopsis  
779 protoplasts: Establishment of a heterodimerization map of group C and group S bZIP  
780 transcription factors. *Plant J.* **46**: 890–900.
- 781 **Fassler, J., Landsman, D., Acharya, A., Moll, J.R., Bonovich, M., and Vinson, C.** BZIP  
782 Proteins Encoded by the Drosophila Genome: Evaluation of Potential Dimerization Partners.
- 783 **Hartmann, L. et al.** Crosstalk between Two bZIP Signaling Pathways Orchestrates Salt-Induced  
784 Metabolic Reprogramming in Arabidopsis Roots.

- 785 **Hartmann, L. et al.** (2015). Crosstalk between Two bZIP Signaling Pathways Orchestrates Salt-  
786 Induced Metabolic Reprogramming in Arabidopsis Roots. *Plant Cell* **27**: tpc.15.00163-.
- 787 **Jakoby, M., Weisshaar, B., Dröge-Laser, W., Vicente-Carbajosa, J., Tiedemann, J., Kroj, T.,**  
788 **and Parcy, F.** (2002). bZIP transcription factors in Arabidopsis. *Trends Plant Sci.*
- 789 P. Jain, K. Shah, N. Sharma, R. Kaur, J. Singh, C. Vinson, V. Rishi A-ZIP53, a dominant  
790 negative reveals the molecular mechanism of heterodimerization between bZIP53, bZIP10  
791 and bZIP25 involved in Arabidopsis seed maturation. *Sci. Rep.*, 7 (2017), Article 14343
- 792 P. Jain, K. Shah, V. Rishi Potential *in vitro* and *ex vivo* targeting of bZIP53 involved in stress  
793 response and seed maturation in *Arabidopsis thaliana* by five designed peptide inhibitors.  
794 Volume 1866, Issue 12, December 2018, Pages 1249-1259
- 795 **Keith, K., Kraml, M., Dengler, N.G., and McCourt, P.** (1994). *fusca3*: A Heterochronic  
796 Mutation Affecting Late Embryo Development in Arabidopsis. *Plant Cell* **6**: 589–600.
- 797 **Kroj, T., Savino, G., Valon, C., Giraudat, J., and Parcy, F.** (2003). Regulation of storage  
798 protein gene expression in Arabidopsis. *Development* **130**: 6065–73.
- 799 **Lam, H.M., Wong, P., Chan, H.K., Yam, K.M., Chen, L., Chow, C.M., and Coruzzi, G.M.**  
800 (2003). Overexpression of the *ASN1* gene enhances nitrogen status in seeds of Arabidopsis.  
801 *Plant Physiol.* **132**: 926–935.
- 802 **Lara, P., Oñate-Sánchez, L., Abraham, Z., Ferrándiz, C., Díaz, I., Carbonero, P., and**  
803 **Vicente-Carbajosa, J.** (2003a). Synergistic activation of seed storage protein gene  
804 expression in Arabidopsis by ABI3 and two bZIPs related to OPAQUE2. *J. Biol. Chem.* **278**:  
805 21003–21011.
- 806 **Lara, P., Oñate-Sánchez, L., Abraham, Z., Ferrándiz, C., Díaz, I., Carbonero, P., and**  
807 **Vicente-Carbajosa, J.** (2003b). Synergistic activation of seed storage protein gene  
808 expression in Arabidopsis by ABI3 and two bZIPs related to OPAQUE2. *J. Biol. Chem.* **278**:  
809 21003–21011.
- 810 **Le, B.H. et al.** (2010). Global analysis of gene activity during Arabidopsis seed development and

- 811 identification of seed-specific transcription factors.
- 812 **Mair, A. et al.** (2015). SnRK1-triggered switch of bZIP63 dimerization mediates the low-energy  
813 response in plants. *Elife*.
- 814 **Martinho, C., Confraria, A., Elias, C.A., Crozet, P., Rubio-Somoza, I., Weigel, D., and**  
815 **Baena-González, E.** (2015). Dissection of miRNA pathways using Arabidopsis mesophyll  
816 protoplasts. *Mol. Plant* **8**: 261–275.
- 817 **Meinke, D.W., Franzmann, L.H., Nickle, T.C., and Yeung, E.C.** (1994). Leafy Cotyledon  
818 Mutants of Arabidopsis. *Plant Cell* **6**: 1049–1064.
- 819 **Parcy, F., Valon, C., Raynal, M., Gaubier-Comella, P., Delseny, M., and Giraudat, J.** (1994).  
820 Regulation of gene expression programs during Arabidopsis seed development: roles of the  
821 ABI3 locus and of endogenous abscisic acid. *Plant Cell* **6**: 1567–1582.
- 822 **Rishi, V., Gal, J., Krylov, D., Fridriksson, J., Boysen, M.S., Mandrup, S., and Vinson, C.**  
823 (2004). SREBP-1 dimerization specificity maps to both the helix-loop-helix and leucine  
824 zipper domains: Use of a dominant negative. *J. Biol. Chem.* **279**: 11863–11874.
- 825 **Santos-Mendoza, M., Dubreucq, B., Baud, S., Parcy, F., Caboche, M., and Lepiniec, L.**  
826 (2008a). Deciphering gene regulatory networks that control seed development and maturation  
827 in Arabidopsis. *Plant J.*
- 828 **Santos-Mendoza, M., Dubreucq, B., Baud, S., Parcy, F., Caboche, M., and Lepiniec, L.**  
829 (2008b). Deciphering gene regulatory networks that control seed development and maturation  
830 in Arabidopsis. *Plant J.* **54**: 608–620.
- 831 **Sreenivasulu, N. and Wobus, U.** (2013). Seed-development programs: a systems biology-based  
832 comparison between dicots and monocots. *Annu. Rev. Plant Biol.* **64**: 189–217.
- 833 **Stone, S.L., Kwong, L.W., Yee, K.M., Pelletier, J., Lepiniec, L., Fischer, R.L., Goldberg, R.B.,**  
834 **and Harada, J.J.** (2001). LEAFY COTYLEDON2 encodes a B3 domain transcription factor  
835 that induces embryo development. *Proc. Natl. Acad. Sci. U. S. A.* **98**: 11806–11.
- 836 **To, A., Valon, C., Savino, G., Guilleminot, J., Devic, M., Giraudat, J., and Parcy, F.** (2006).

837 A network of local and redundant gene regulation governs Arabidopsis seed maturation. *Plant*  
838 *Cell* **18**: 1642–51.

839 **Vicente-Carbajosa, J. and Carbonero, P.** (2005). Seed maturation: Developing an intrusive  
840 phase to accomplish a quiescent state. *Int. J. Dev. Biol.* **49**: 645–651.

841 **Vinson, C., Myakishev, M., Acharya, A., Mir, A.A., Moll, J.R., and Bonovich, M.** (2002).  
842 MINIREVIEW Classification of Human BZIP Proteins Based on Dimerization Properties.  
843 *Mol. Cell. Biol.* **22**: 6321–6335.

844 **Wang, Y., Li, L., Ye, T., Lu, Y., Chen, X., and Wu, Y.** (2013). The inhibitory effect of ABA on  
845 floral transition is mediated by ABI5 in Arabidopsis. *J. Exp. Bot.* **64**: 675–684.

846 **Weirauch, M.T. et al.** (2014). Determination and Inference of Eukaryotic Transcription Factor  
847 Sequence Specificity. *Cell* **158**: 1431–1443.

848 **Weltmeier, F. et al.** (2009). Expression patterns within the Arabidopsis C/S1 bZIP transcription  
849 factor network: Availability of heterodimerization partners controls gene expression during  
850 stress response and development. *Plant Mol. Biol.*

851 **Weltmeier, F., Ehlert, A., Mayer, C.S., Dietrich, K., Wang, X., Schü Tze, K., Alonso, R.,**  
852 **Harter, K., Vicente-Carbajosa, J.S., and Drö Ge-Laser, W.** (2006). Combinatorial control  
853 of Arabidopsis proline dehydrogenase transcription by specific heterodimerisation of bZIP  
854 transcription factors. *EMBO J.* **25**: 3133–3143.

855 **Yoo, S.-D., Cho, Y.-H., and Sheen, J.** (2007). Arabidopsis mesophyll protoplasts: a versatile cell  
856 system for transient gene expression analysis. *Nat. Protoc.* **2**: 1565–1572.

857

858

859

860

861

862

863

864

865

866 **Table I: Immunoprecipitated bZIPs**

|                                  | Transgenic                             |                | A-ZIP53 protein incubated with whole protein extract from wild-type Arabidopsis |
|----------------------------------|----------------------------------------|----------------|---------------------------------------------------------------------------------|
|                                  | Immature siliques and seeds            | Leaves         |                                                                                 |
| <b>Immuno-precipitated bZIPs</b> | 29, 14, 33, 17, 33, 69, 10, 25, and 53 | 67, 33, 17, 29 | 33, 34, 19, 17, 29, PAN, and unfertilized Sac4                                  |

867

868

869

870

871

872

873

874 **Supplementary Figure:**

875 **Supplementary FigureS1** Geneinvestigator revealed the expression of bZIP53 (Red), bZIP10  
876 (Blue–first panel), bZIP25 (Light green), target genes (**2S2**: Orange, **CRU3**: Violet, **LEA76**:  
877 Yellow, **ProDH**: Brown, **ASN1**: Sky Blue, **CRA1**: Grey), Non heterodimerizing partner (**bZIP72**:  
878 Blue- second panel, **bZIP39**: Green) and Non target gene (**SHB1**: Orange- second panel) in the  
879 different development stage of *Arabidopsis*.

880 **Supplementary FigureS2** Phenotypic alteration and expression analysis of target genes of bZIP53  
881 and its dimerizing partners in T3 generation. (**A, B**) Growth of the four and eight week old wild  
882 type and transgenic (**C, D, E**) Eight weeks old mutants of *bzip10*, *bzip25*, and *bZIP53* (**F**)  
883 Differences in the rosette diameter of three week old transgenic, mutants (*bZIP53*, *bzip10*, and  
884 *bzip25*) and wild-type under standard condition. Error bar represent  $\pm$  mean and SD of 8-10  
885 individual plants. (**G**) Expression of target genes of *bZIP53*, *bZIP10*, and *bZIP25* involved in the  
886 seed maturation from the immature silique and seeds of transgenic. Error bar represent  $\pm$ S.D. of  
887 three technical replicates.

888 **Supplementary FigureS3** Seed weight calculated (mg/25 seeds). Transgenic has lesser weight  
889 compare to WT.  $\pm$ Mean and S.D. of three independent replicate was calculated. One way Anova  
890 was used to check the level of significance ( $p < .01$ , ns = not significant).

891 **Supplementary FigureS4** Peptide fingerprinting of immunoprecipitated leucine zipper domain of  
892 bZIP53/A-ZIP53.

893

894 **Supplementary Figure S6** Amino acid sequences of B-ZIP53, B-ZIP14, B-ZIP15, B-ZIP17, B-  
895 ZIP29, B-ZIP33, B-ZIP34, B-ZIP46, and B-ZIP69. **A**) At the top is the delineation of N-terminal  
896 basic DNA-binding region followed by dimerizing leucine zipper region. Amino acid sequences  
897 represented by the single-letter code are aligned with respect to an invariant asparagine (N) and  
898 arginine (R) (shown in red) in the basic region. Only ten amino acids upstream of asparagine are  
899 shown. Tenth amino acid (typically a leucine; Lo) from invariable arginine in the basic DNA-  
900 binding region marks the start of the dimerizing leucine zipper. The leucine zipper sequence is  
901 grouped into heptad (**a,b,c,d,e,f, g**)<sub>n=8</sub>. The limit of a coiled coil at C-terminus is defined by the



902 presence of a proline or two consecutive glycines, both likely helix-breaking residues and the  
903 absence of charged amino acids in **g** and **e'** positions in a heptad. Also shown below is a consensus  
904 sequence for B-ZIP motif, where  $\Psi$  represents any hydrophobic amino acid. Proteins are placed in  
905 three groups with three homodimers and three potential heterodimers. In homodimer coiled coil,  
906 interhelical interactions between amino acids in the **g** position with those in the following **e'**  
907 position are shown as square brackets. Solid square brackets depict attractive interactions between  
908 amino acids with opposite charges in **g** and **e'** positions ( $E \leftrightarrow K$ ,  $K \leftrightarrow E$ ,  $D \leftrightarrow R$ ) whereas interhelical  
909 repulsive interactions between **g** and **e'** position amino acids are shown by discontinuous square  
910 brackets ( $K \leftrightarrow R$ ). In the putative heterodimer coiled coil (B-ZIP53+B-ZIP14, B-ZIP53+B-ZIP15,  
911 B-ZIP53+B-ZIP29, B-ZIP53+B-ZIP33, B-ZIP53+B-ZIP34, B-ZIP53+B-ZIP46, B-ZIP53+B-  
912 ZIP69) attractive interactions between amino acids at **g** and **e'** position are shown by solid diagonal  
913 lines ( $E \leftrightarrow K$ ,  $R \leftrightarrow E$ ,  $R \leftrightarrow D$ ,  $K \leftrightarrow D$ ) and repulsive interactions are depicted by discontinuous lines  
914 ( $K \leftrightarrow K$ ,  $K \leftrightarrow R$ ). **B)** The number of attractive and repulsive **g** $\leftrightarrow$ **e'** salt bridges formed in three  
915 homodimers and three putative heterodimers. **B)** The number of attractive and repulsive **g** $\leftrightarrow$ **e'** salt  
916 bridges formed in homodimers and putative heterodimers

917 **Supplementary Figure S7** Heterodimers between A-ZIP53 and the immunoprecipitated B-ZIPs  
918 **A)** Alignment of acidic helical extensions used in this study with DNA-binding region of wild type  
919 B-ZIPs showing the possible interhelical interactions in homodimers and heterodimers. At the top  
920 is shown the coiled coil heptad designations (**a,b,c,d,e,f**, and **g**). A-ZIP53 acidic extension are  
921 aligned with the basic region of B-ZIPs. invariable asparagine at **g** position ( $L_{-2}$ ), and arginine at  
922 **a** position ( $L_{-3}$ ) are shown in bold. In homodimer coiledcoil, interhelical interactions between  
923 amino acids in the **g** position with those in the following **e'** position are shown as square brackets.  
924 Solid square brackets depict attractive interactions between oppositely charged amino acids in **g**  
925 and **e'** positions whereas broken square brackets shows repulsive interactions due to the presence  
926 of similar charges ( $E \leftrightarrow E$ ). In the putative heterodimeric coiled-coil, attractive interactions between  
927 **g** and **e'** positions amino acids are shown by solid diagonal lines. **B)** The number of attractive and  
928 repulsive **g** $\leftrightarrow$ **e'** salt bridges formed in homodimers and putative heterodimers.

929

930

931 **Supplementary Tables**

932 **Table 1** DNA binding sites of target bZIPs on their corresponding genes.

933 **Table 2** Primer sequences for the qRT PCR.

934 **Table 3** Primer sequence for the cloning of A-ZIP53 into the pRI101AN

935 **Table 4** Comparisons of length and width of seeds

936 **Table 5** Dry weight of mature seed (25 seeds)

937 **Table 6** Differences in the flower size of wildtype, mutant (*bZIP53*, *bzip25*, and *bzip10*) and  
938 transgenic

939 **Table 7 Differences in the length and width of siliques of** wildtype, mutants (*bZIP53*, *bzip25*,  
940 *and bzip10*), and transgenic.

941 Table 8 Genes downregulated in A-ZIP53 expressing transgenic plants

942 Table 9 Immunoprecipitated peptides in A-ZIP53 epressing transgenic plants

943

944

945

Figure 1

## A-ZIP53

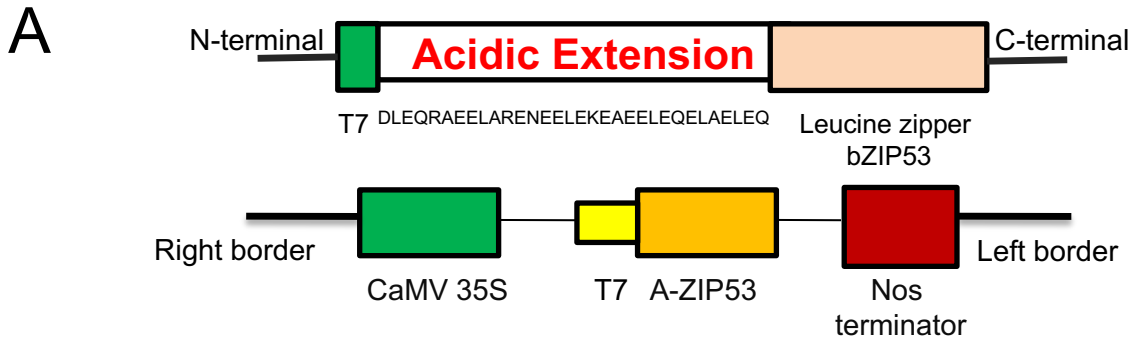

**B**

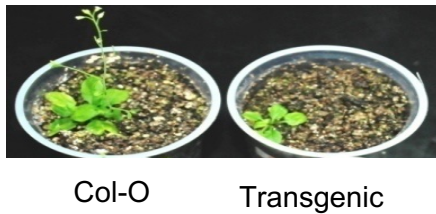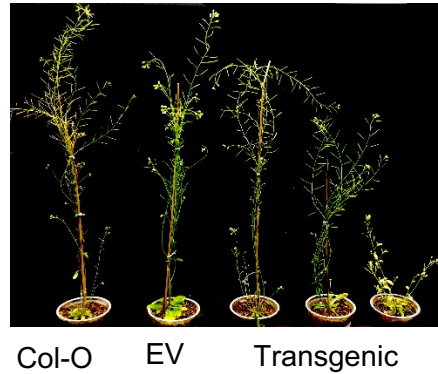

**C**

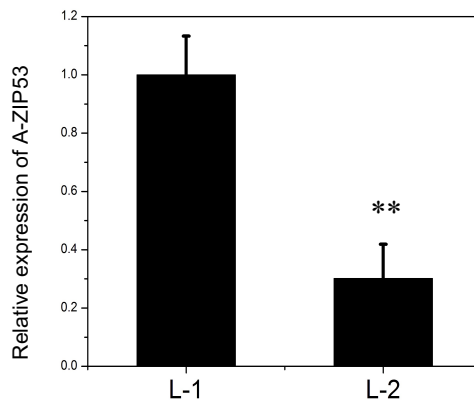

**Figure1** Constitutive expression of A-ZIP53 in wild-type *Arabidopsis thaliana*

**(A)** Schematic of Pro35S: A-ZIP53 construct as described in Materials and method.

**(B)** Phenotype alternation and abnormal growth pattern of 12 weeks old transgenic *Arabidopsis*

of T -1 generation. **(C)** Differential expression of A-ZIP53 in different lines of transgenic. Error

bar represent ( $\pm$ ) mean and S.D of three biological replicates. The level of significance was

calculated using oneway ANOVA. \*\* level of significance ( $P < .01$ ). Error bar indicates mean and S.D. of three biological replicates.

Figure 2

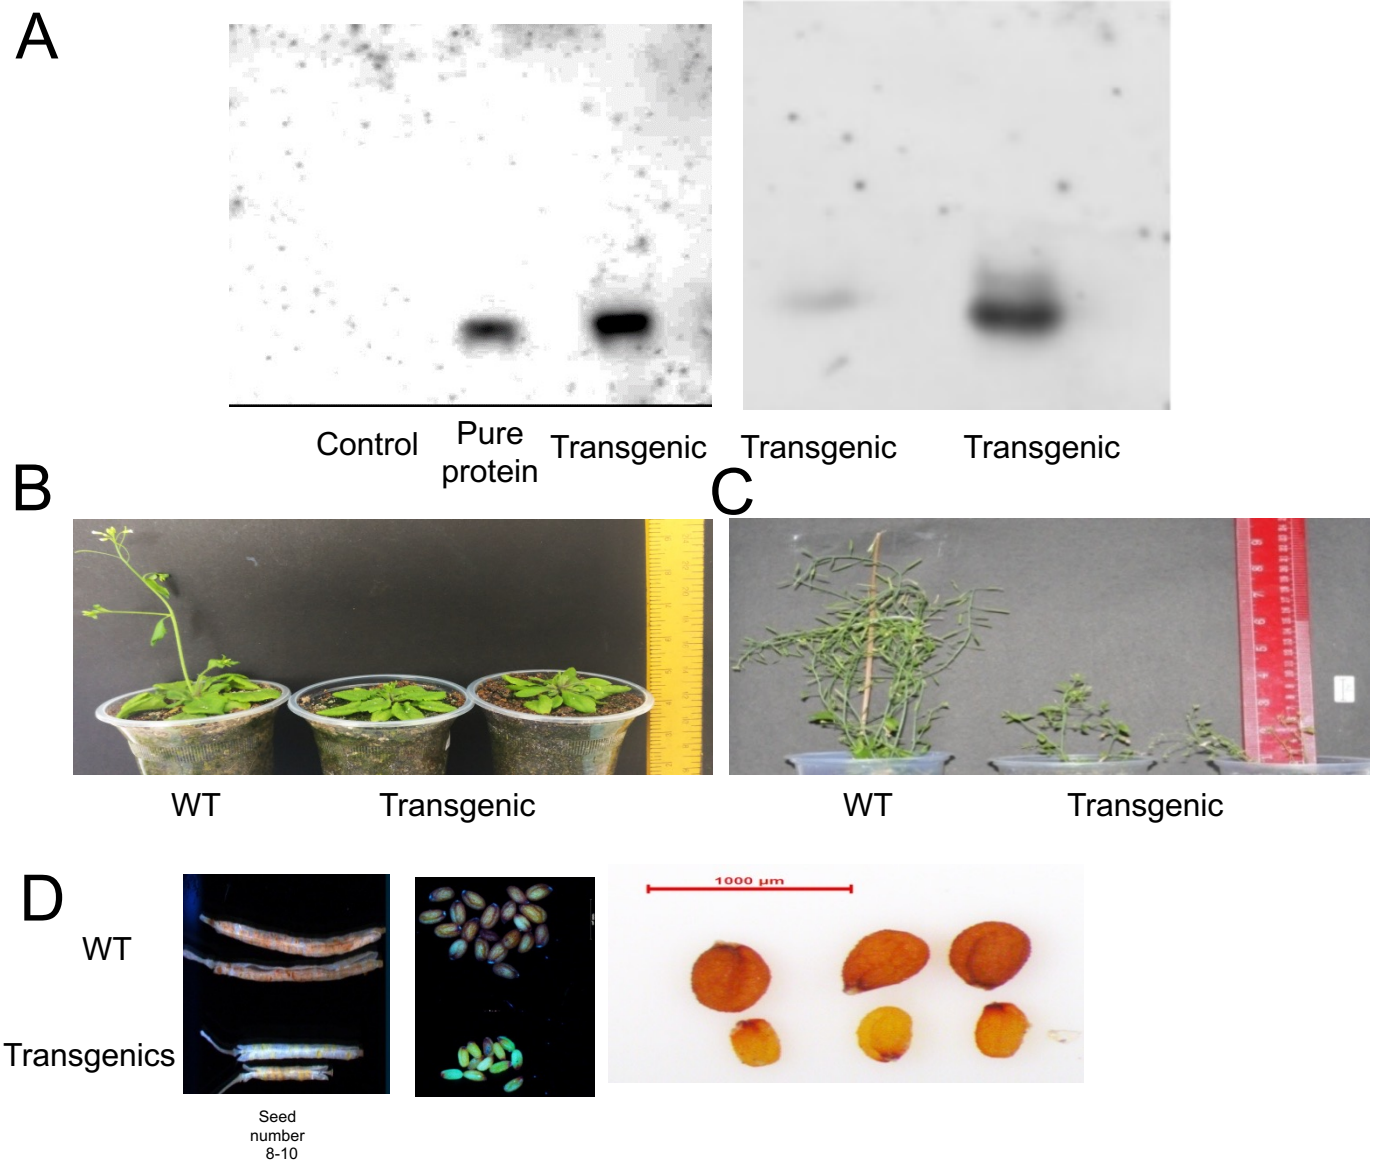

**Figure 2 (A)** Western blot confirms the expression of A-ZIP53 in five days old seedling. **(B)** Phenotypic variation in the growth of four weeks old transgenic compared to wild type **(C)** Differences in the growth of six weeks old transgenic and wild-type. **(D)** Variation in the silique and seeds of wild type and transgenic.

Figure 3

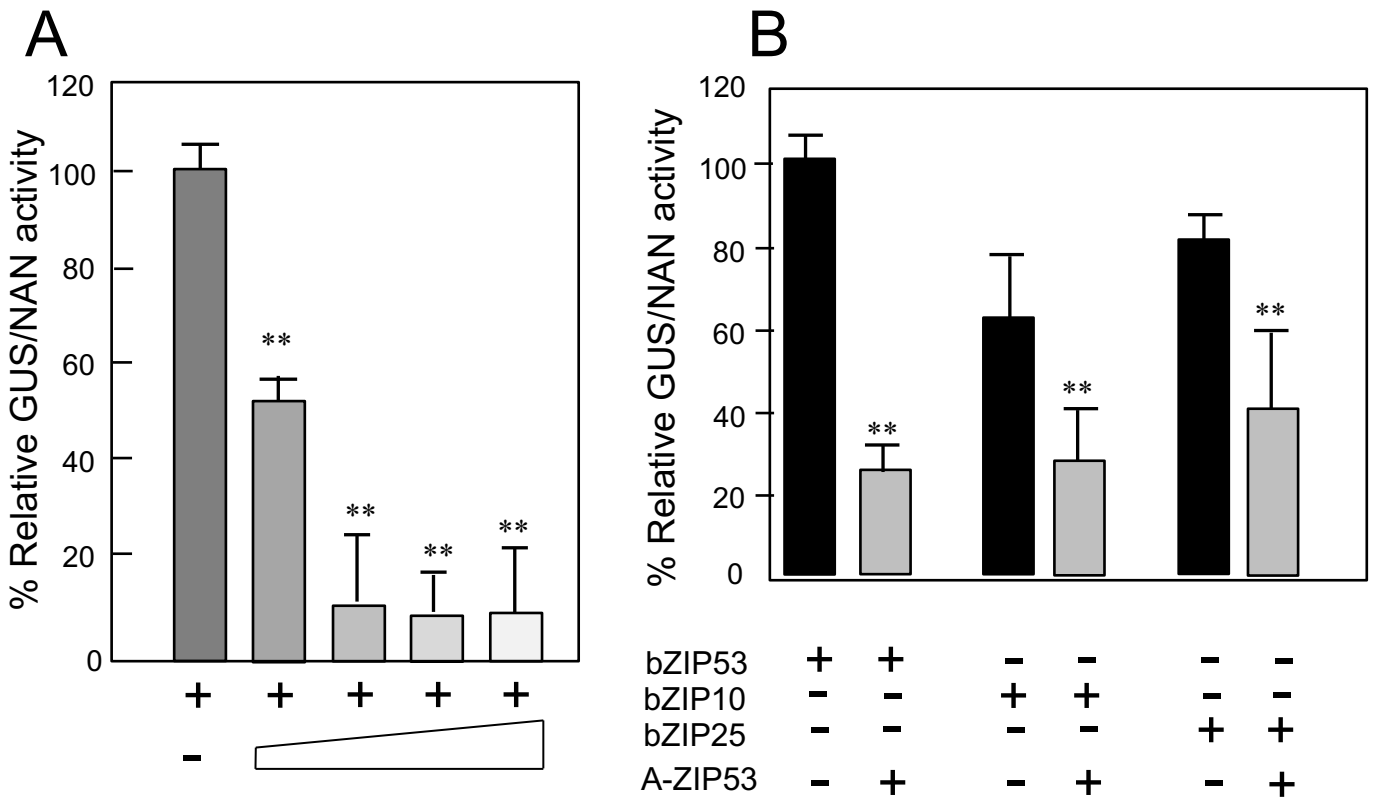

**Figure 3:** A-ZIP53 hinders the DNA binding activity of target bZIPs in the transient transfection assay using *Arabidopsis* protoplast. **(A) Dose dependent Assay:** 9 µg of bZIP53 and the indicated increasing molar eq of A-ZIP53 plasmids were co transformed into protoplast. The y axis defined as relative GUS/NAN activity. **(B)** BY-2 cell line protoplasts were transformed with 9 µg of bZIPs (53, 10, and 25) with 2 molar eq of A-ZIP53. 35S:NAN used as an internal control plasmid (1 µg). The Y axis represented as relative GUS/NAN activity (Alonso et al., 2009). Error bar represent (±) mean and S.D of three replicates from three independent transfection. The level of significance was calculated using oneway ANOVA. \*\*\* level of significance (P < .01). Error bar indicates mean and S.D. of three biological replicates.

Figure 4

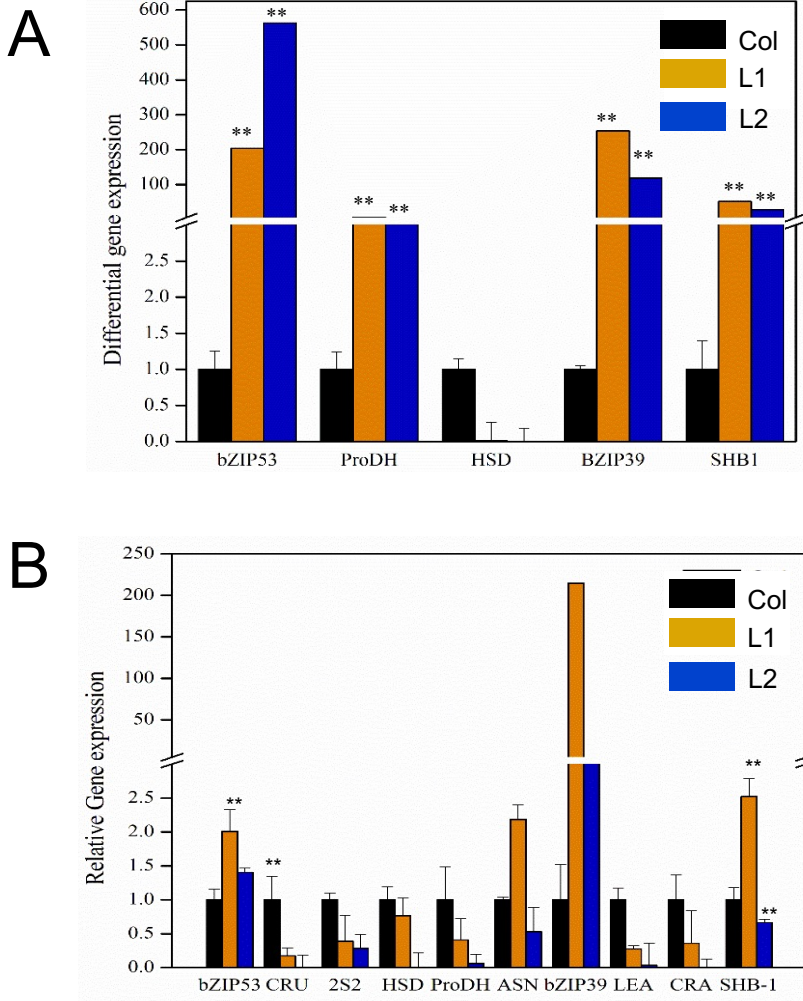

**Figure4 (A)** qRT-PCR revealed the expression of bZIP53, bZIP39, target (CRU, ProDH, ASN1, CRA1, and HSD1) of *bZIP53* and non-target gene (SHB -1) from the leaves of four weeks old transgenic and **(B)** immature siliques and seeds of six-week old plants. Error bar represent ( $\pm$ ) mean and S.D of three replicates. The level of significance was calculated using oneway ANOVA. \*\*\* level of significance ( $P < .01$ ). Error bar indicates mean and S.D. of three biological replicates.

# Figure 5

## A

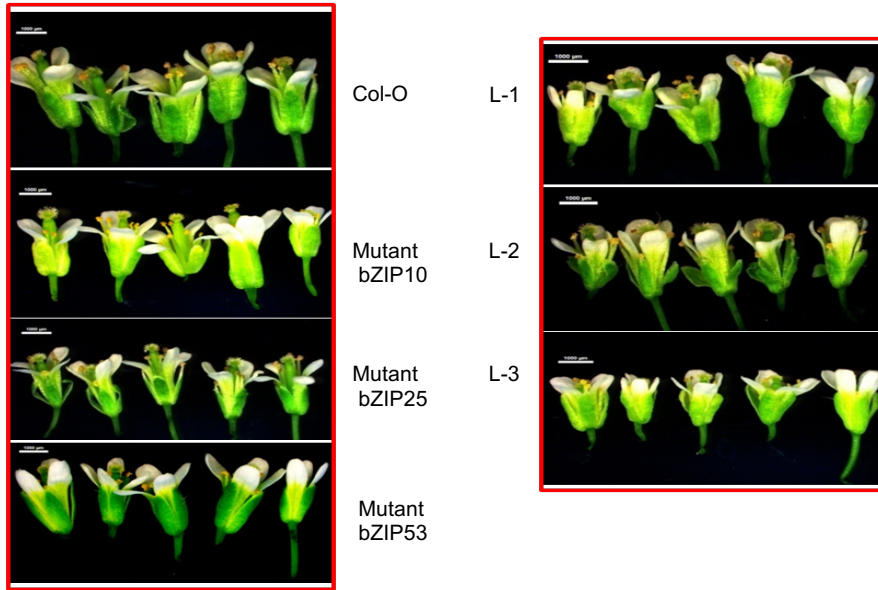

## B

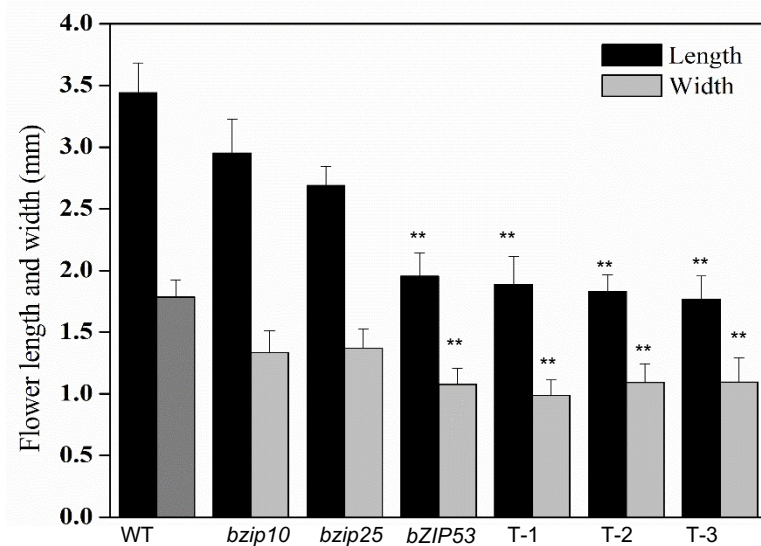

**Figure 5(A)** Differences between length and size of flowers of mutants (*bzip10*, *bzip25*, and *bZIP53*) and transgenic of six weeks old plant **(B)** Significant differences between length and width of transgenic and mutants compared to wild-type. The level of significance was calculated using oneway ANOVA. \*\* level of significance ( $P < .01$ ). Error bar indicates mean and S.D. of three biological replicates.

# Figure 6

## A

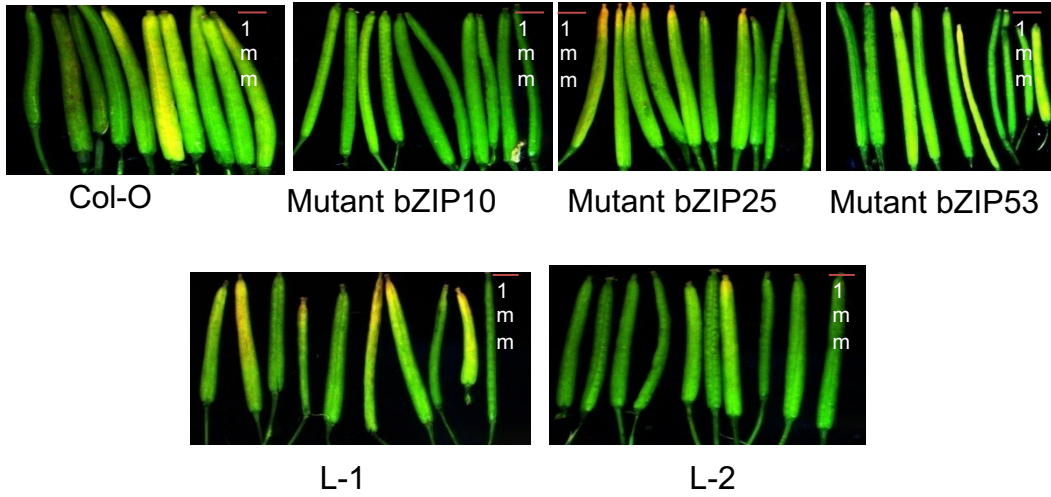

## B

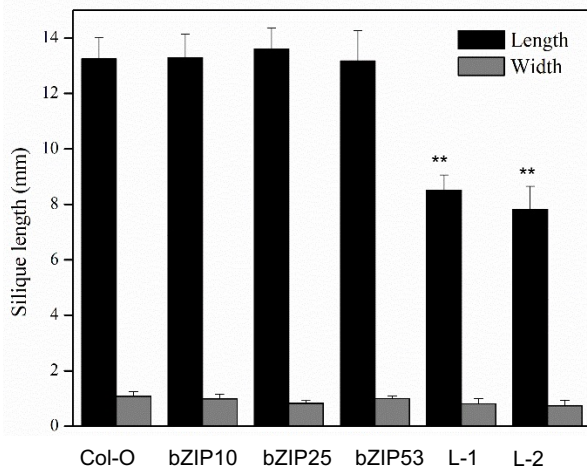

## C

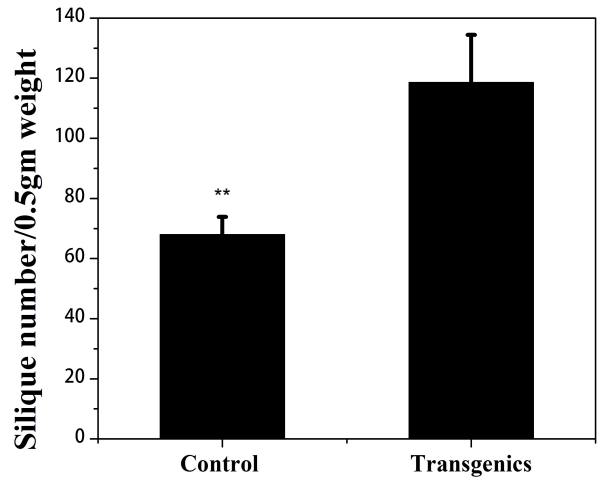

**Figure6 (A)** Silique size of transgenic were smaller compared to mutants and wild type.

**(B)** Length and width of siliques were compared. Error bar represent  $\pm$ mean and SD of siliques (n = 8-12)

**(C)** Number of siliques per 0.5 gm of silique weight were more in transgenics compared to wild type. ( $\pm$  mean and S.D. of three independent biological replicates).



Figure 7

A

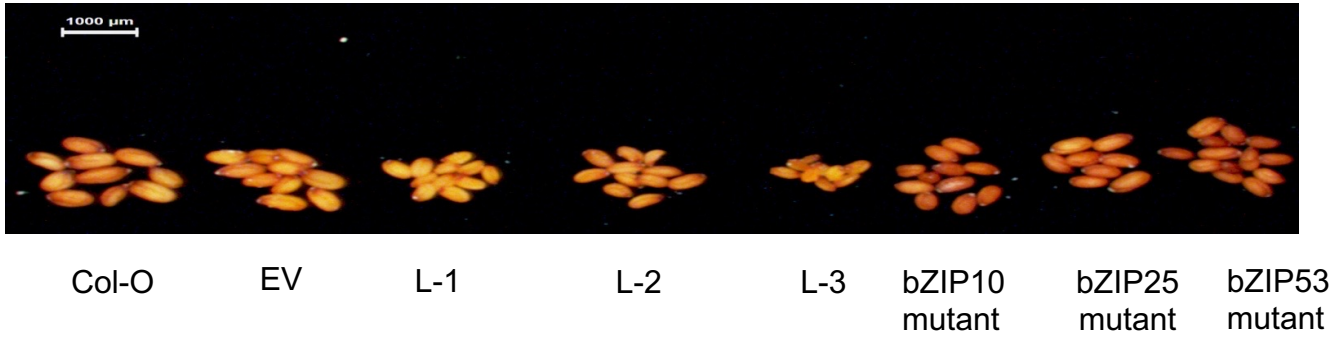

B

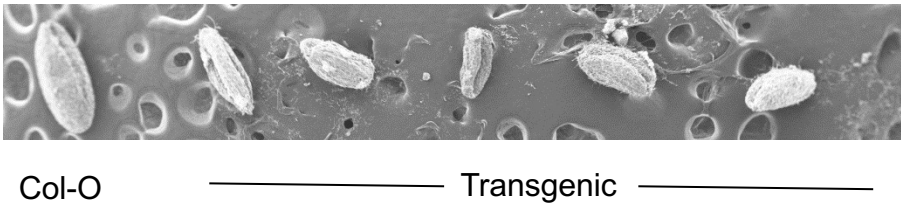

C

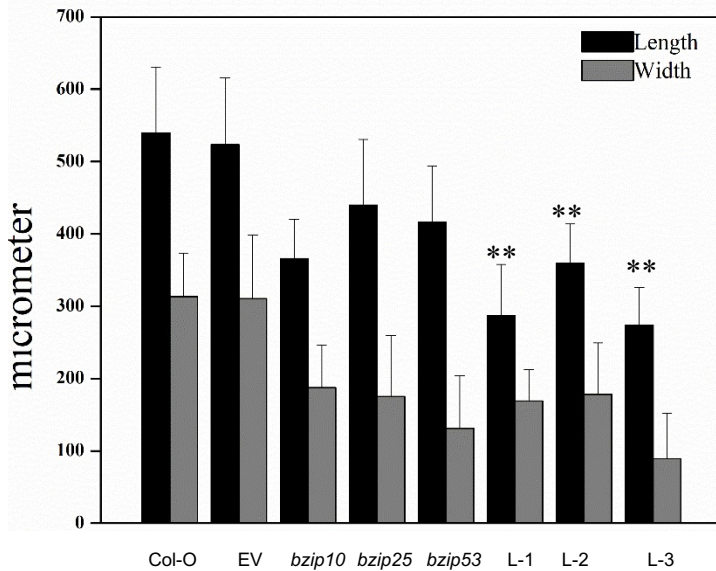

**Figure7** Differences in the seed size of transgenic, wild type, and mutants (*bZIP53*, *bzip10*, and *bzip25*) **(A)** Representative pictures of wild type, mutants and transgenic seeds **(B)** SEM images confirmed the defects in transgenic seed compared to control. **(C)** Seed of transgenic are smaller size compared to mutants and wild type (Error bar represent  $\pm$ mean and SD of siliques (n = 25).

Figure 8

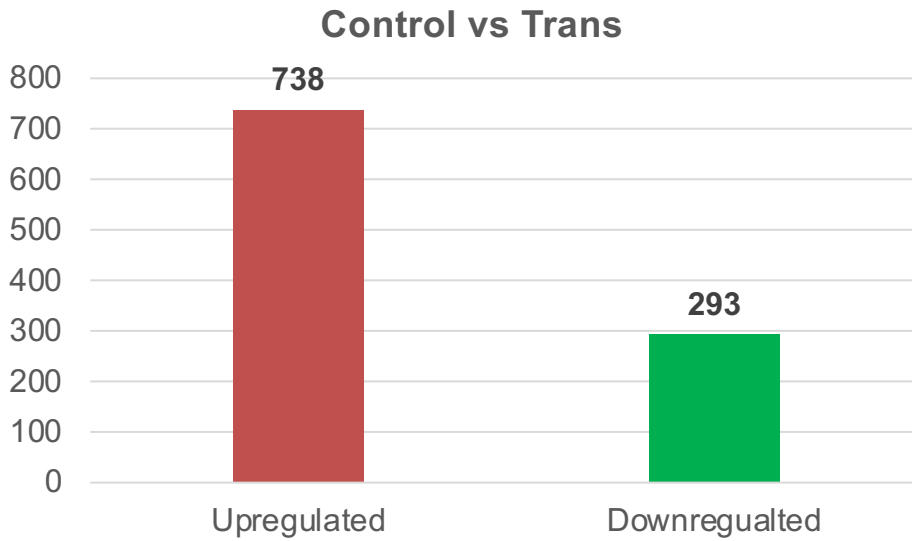

**Figure 8** Differential expression of genes (DEG) based on analysis from two independent biological replicates of wild type and A-ZIP53 expressing transgenic.

Figure 9

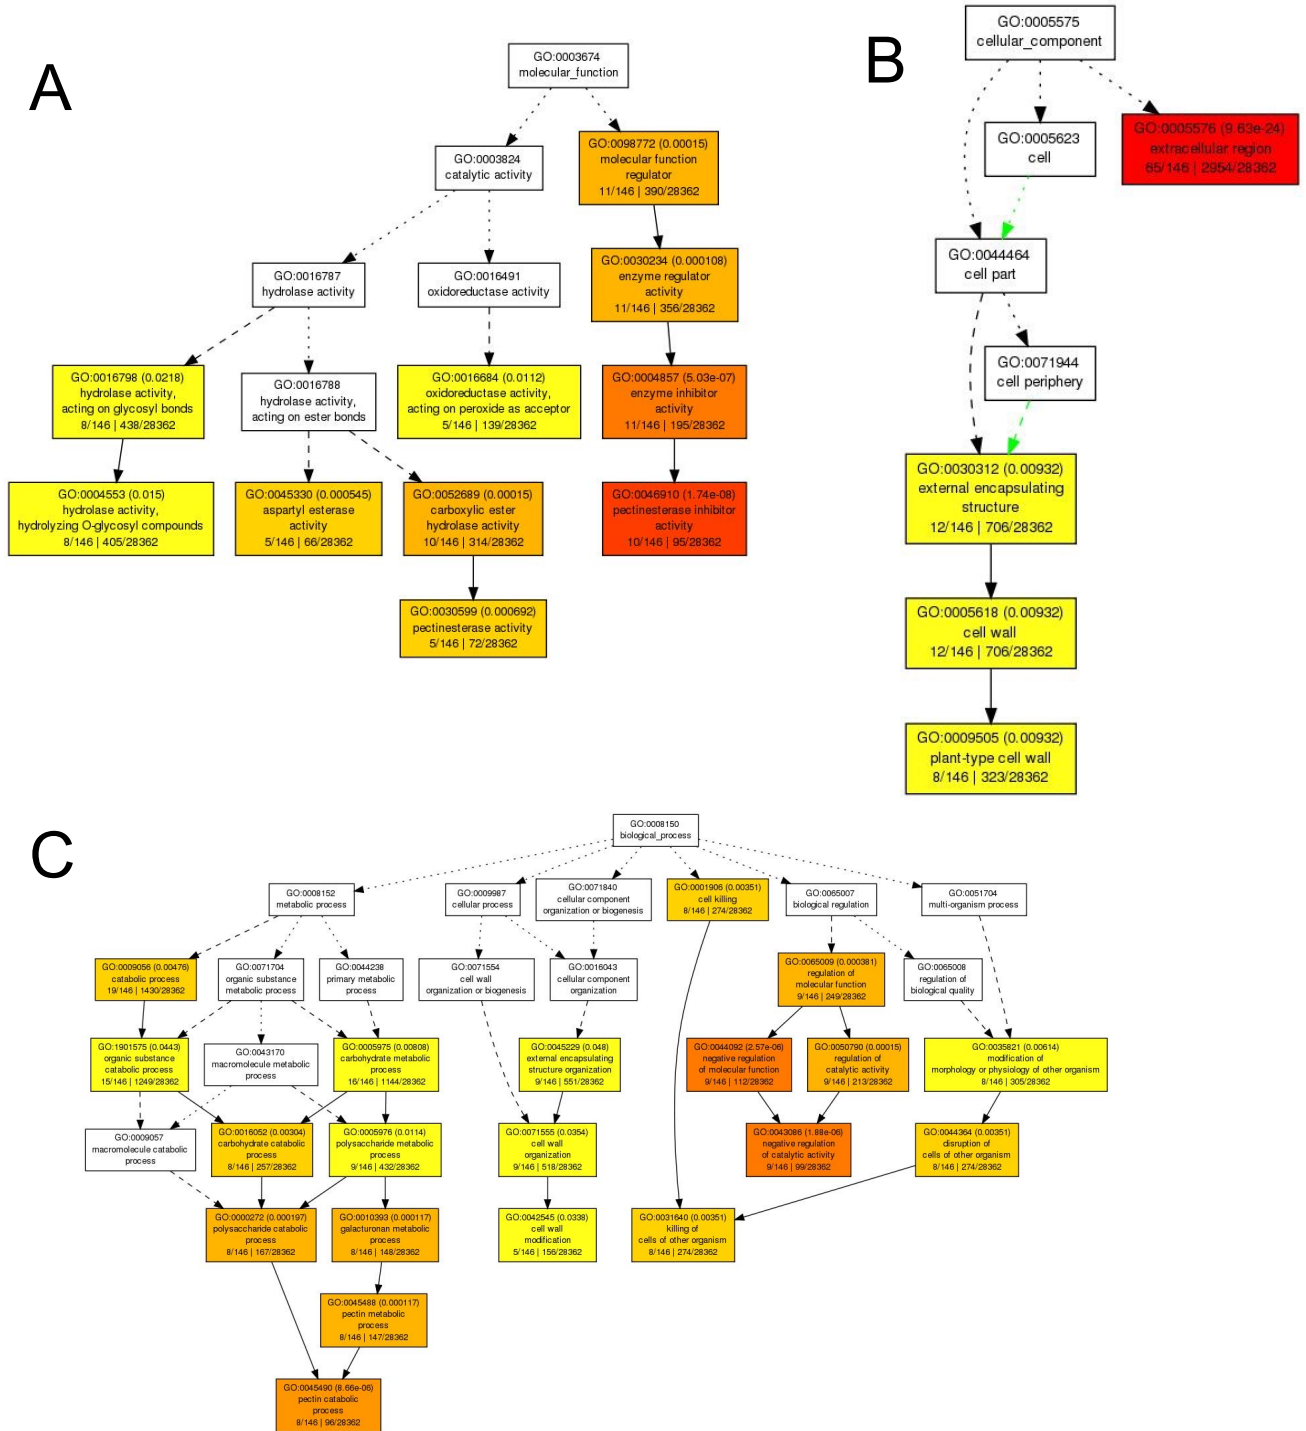

**Figure 9 Gene Ontology enrichment analysis** (for downregulated genes w.r.t. upregulated genes) resulted in selection of large number of enriched classification terms. Similar in case of enriched GO terms in upregulated genes w.r.t. all genes in Arabidopsis. A) Genes involved in molecular function. B) Genes involved in cellular function. C) Genes involved in biological function

Figure 10

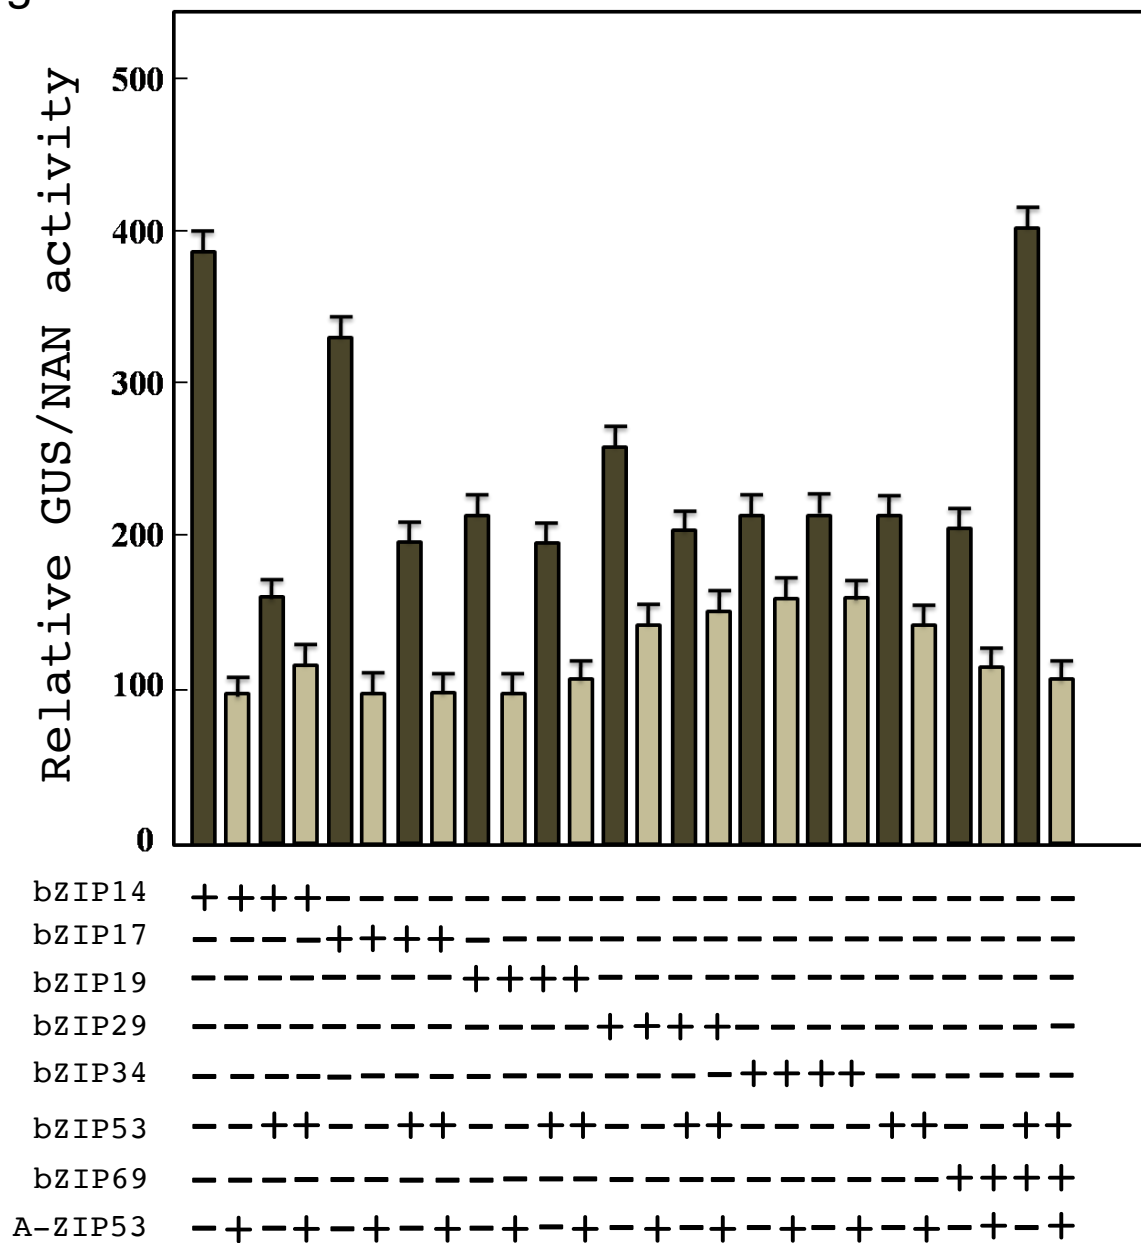

**Figure10** A-ZIP53 hinders the DNA binding of the bZIP14, bZIP17, bZIP19, bZIP29, bZIP34, bZIP53, and bZIP69 and their heterodimer with the bZIP53 mediated reporter gene activity in transient transfection assay using Arabidopsis protoplasts.(A) Plasmid coding for bZIP53 can transactivate the *GUS* reporter gene under the control of the 2S2 promoter that contains a G-box binding site. \*\* represent  $P < 0.01$ . Protoplasts were co-transfected with plasmids coding for bZIPs and A-ZIP53. Transient expressions of A-ZIP53 inhibited the bZIPs-mediated *GUS* reporter activity in dose-dependent manner.. Reporter activity was inhibited in the presence of 3 molar excess of A-ZIP53 plasmid suggesting that A-ZIP53 can compete with G-box for bZIPs binding. Error bars represent standard deviation of three independent experiments.

Figure 11

### Use of a designed Dominant Negative to study seed maturation in *Arabidopsis*

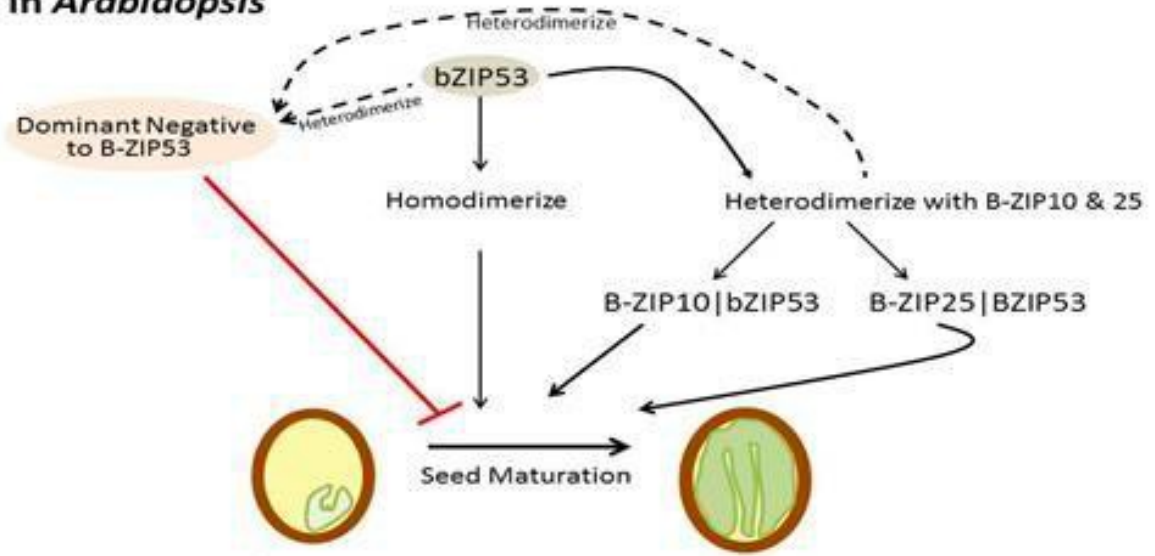

**Figure 11** Model for heterodimeric regulation of *bZIP53*, *bZIP10*, and *bZIP25* involved in the seed maturation by the designed dominant negative protein *A-ZIP53*.

# Supplementary Figure S1

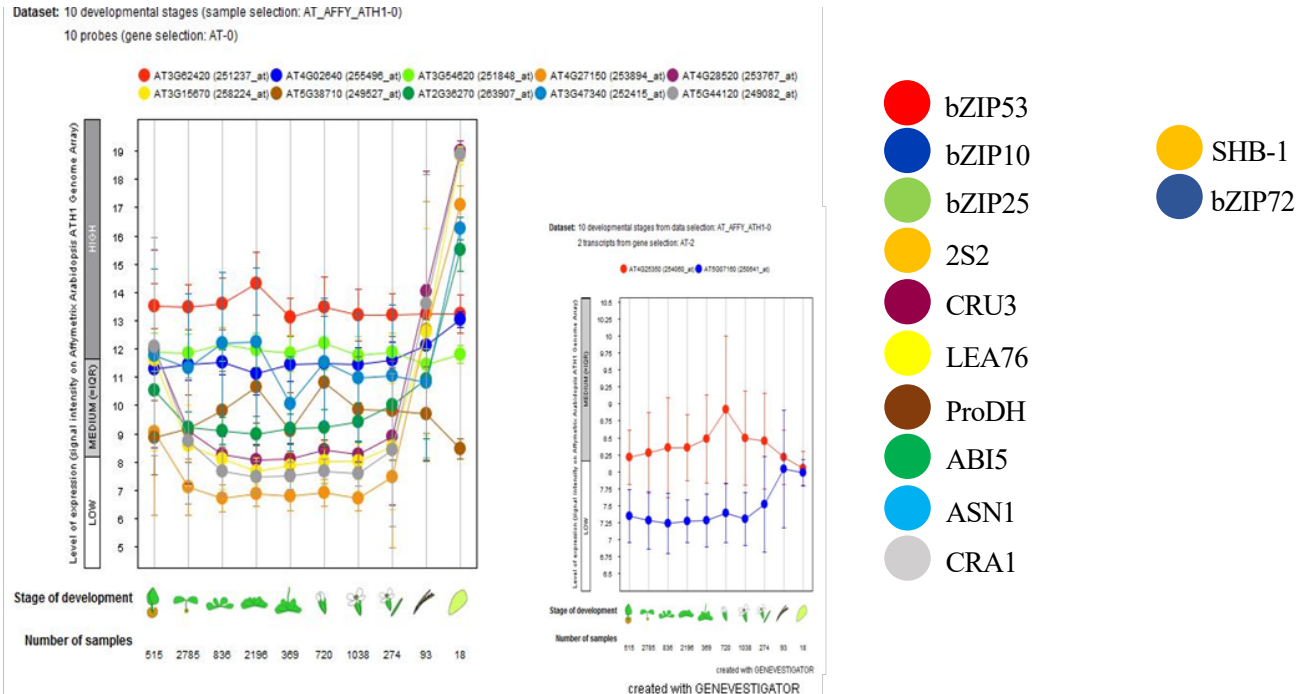

**Supplementary FigureS1** Geneinvestigator revealed the expression of bZIP53 (Red), bZIP10 (Blue—first panel), bZIP25 (Light green), target genes (**2S2**: Orange, **CRU3**: Violet, **LEA76**: Yellow, **ProDH**: Brown, **ASN1**: Sky Blue, **CRA1**: Grey), Non heterodimerizing partner (**bZIP72**: Blue- second panel, **bZIP39**: Green) and Non target gene (**SHB1**: Orange- second panel) in the different development stage of *Arabidopsis*.

## Supplementary Figure S2

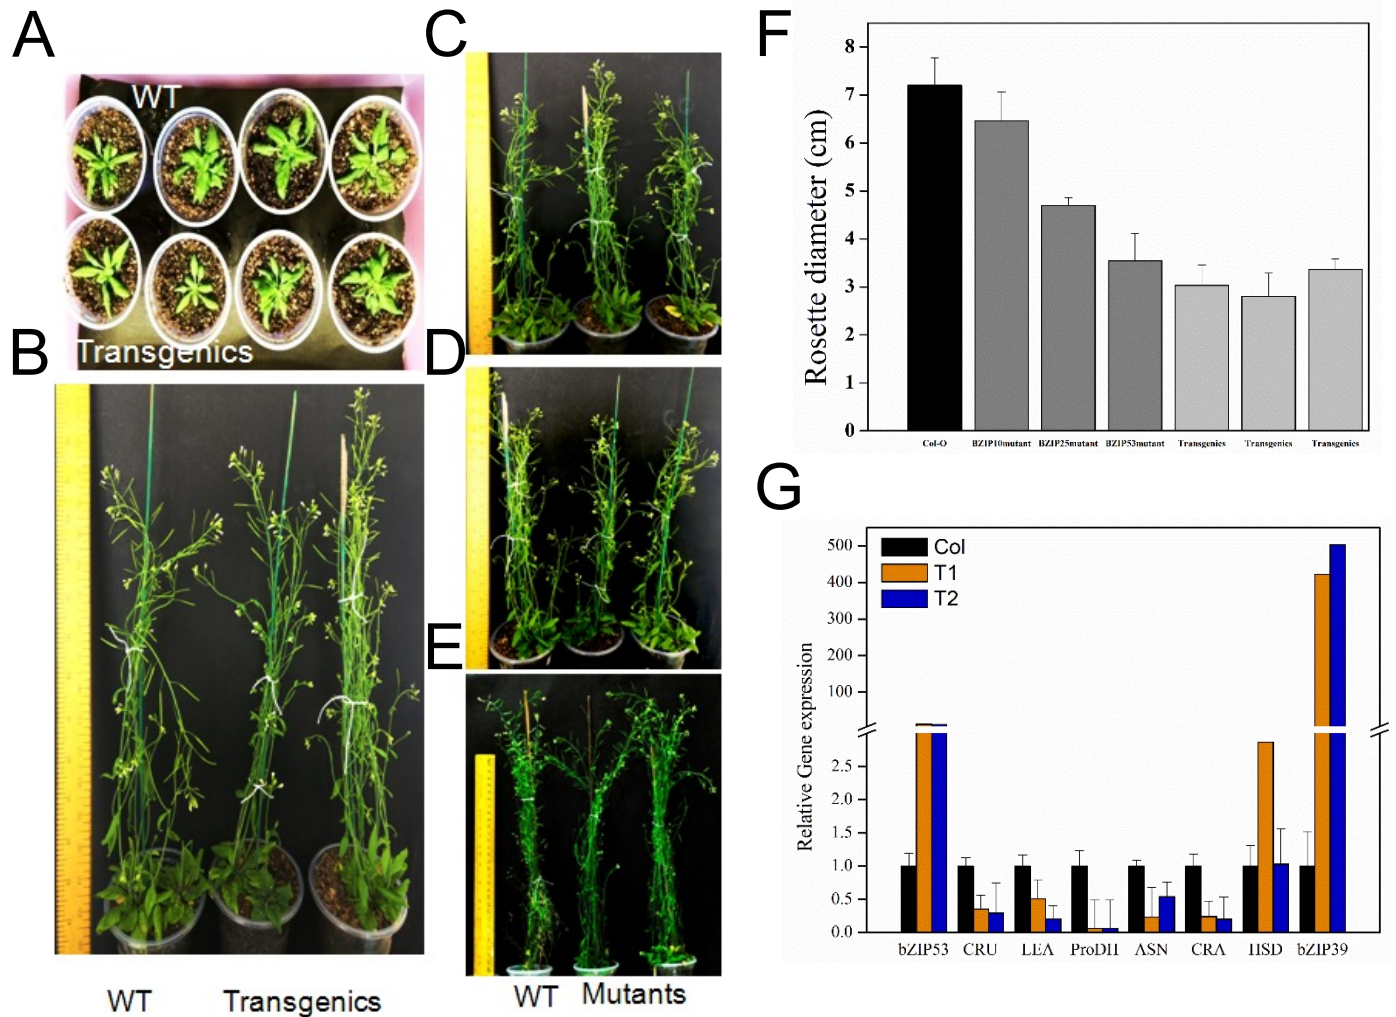

**Supplementary Figure S2** Phenotypic alteration and expression analysis of target genes of *bZIP53* and its dimerizing partners in T3 generation. **(A,B)** Growth of the four and eight week old wild type and transgenic **(C, D, E)** Eight weeks old mutants of *bzip10*, *bzip25*, and *bZIP53* **(F)** Differences in the rosette diameter of three week old transgenic, mutants (*bZIP53*, *bzip10*, and *bzip25*) and wild-type under standard condition. Error bar represent  $\pm$  mean and SD of 8-10 individual plants. **(G)** Expression of target genes of *bZIP53*, *bZIP10*, and *bZIP25* involved in the seed maturation from the immature silique and seeds of transgenic. Error bar represent  $\pm$ S.D. of three technical replicates.

## Supplementary Figure S3

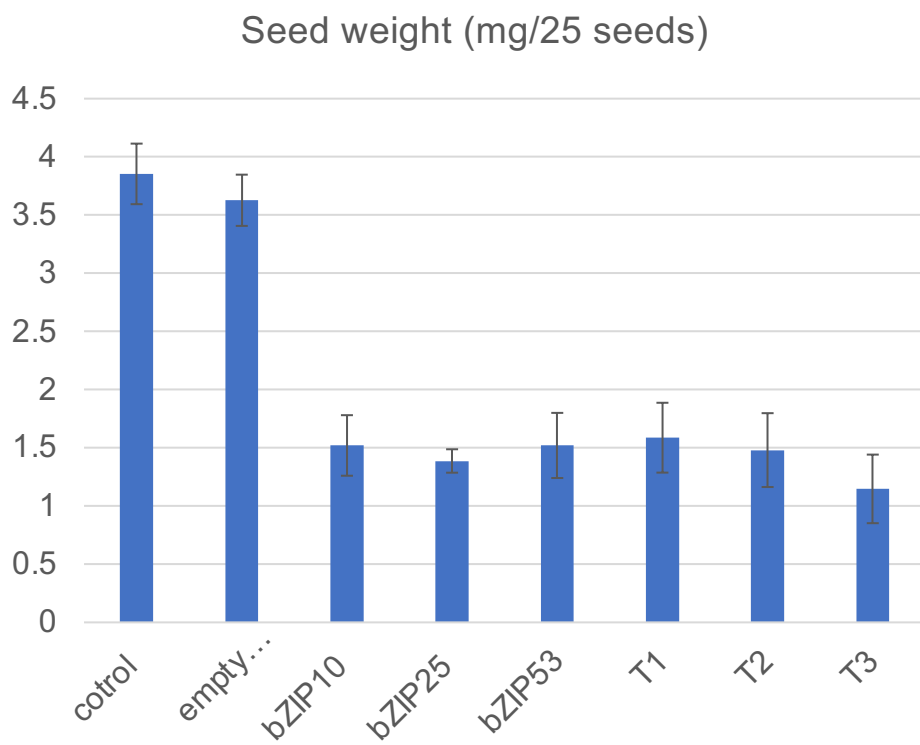

**Supplementary FigureS3** Seed weight calculated (mg/25 seeds). Transgenic has lesser weight compare to WT.  $\pm$ Mean and S.D. of three independent replicate was calculated. One way Anova was used to check the level of significance ( $p < .01$ , ns = not significant).



# Supplementary Figure S4

**A**

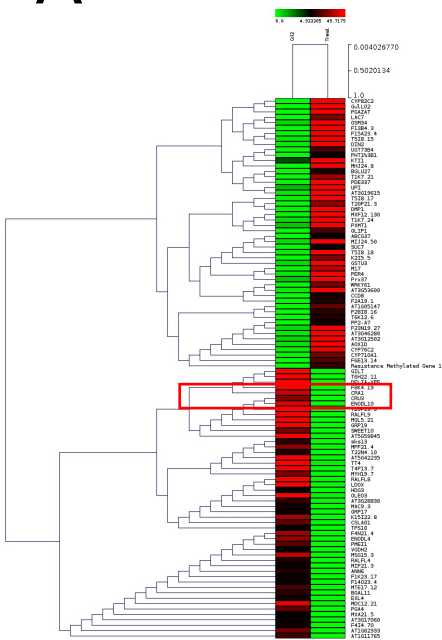

Col Vs Transgenic

Heat map showed the genes related to seed maturation are down regulated

**B**

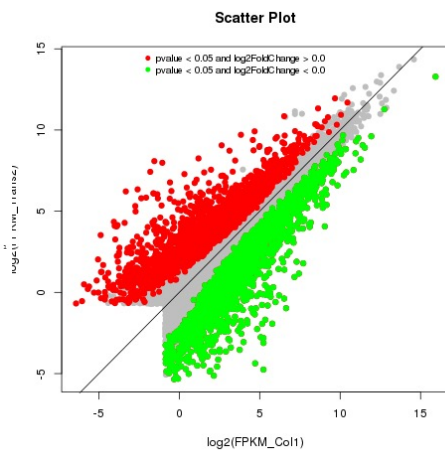

Col Vs Transgenic

Scatter plot

**C**

Genes exclusively expressed in A-ZIP53

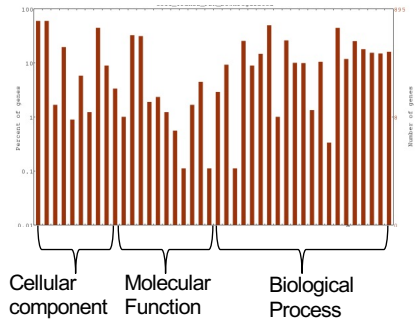

Genes exclusively expressed in WT

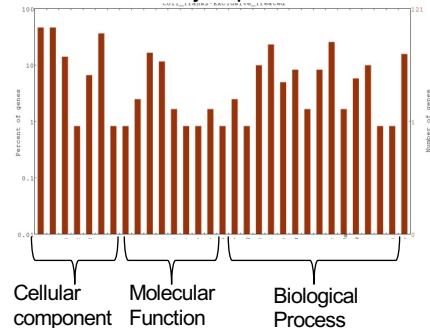

Wego plot confirmed the significant differences in the expression of genes

Supplementary Figure S4: RNA-seq of A-ZIP53 expressing transgenic Arabidopsis

# Supplementary Figure S5

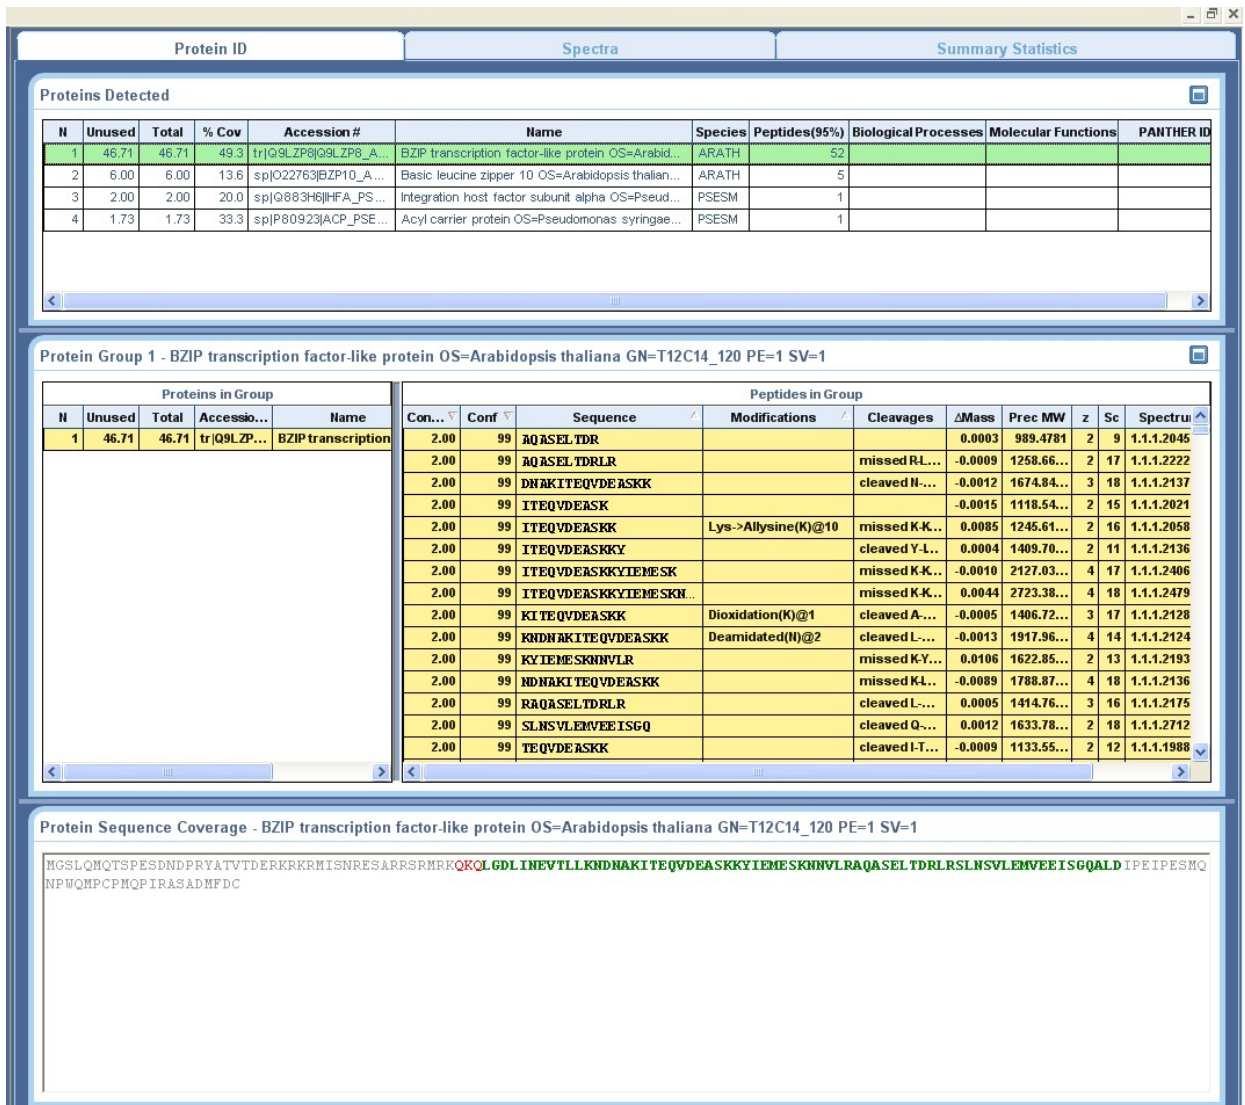

**Supplementary Figure S5:** Peptide fingerprinting of Immunoprecipitated leucine zipper domain of bZIP53/A-ZIP53 from total protein soup of Arabidopsis.

# Supplementary Figure S6

## A

Basic DNA-binding region

Dimerizing leucine zipper region

|               |                                                               | L       | L       | L       | L       | L       | L       | L       | L       | L       | L       |
|---------------|---------------------------------------------------------------|---------|---------|---------|---------|---------|---------|---------|---------|---------|---------|
|               |                                                               |         | 1       | 2       | 3       | 4       |         | 5       |         | 6       |         |
|               |                                                               | gabcdef | gabcdef | gabcdef | gabcdef | gabcdef | gabcdef | gabcdef | gabcdef | gabcdef | gabcdef |
| <b>bZIP53</b> | DERKRRKRMIS <b>N</b> RESARRS <b>R</b> MRKQKQLGDLI             | EVTLLKN | DNAKITE | QVDEASK | KYIEMES | KNNVLRA | QASELTD | RLRSLNS | VLEMVEE |         |         |
| <b>bZIP10</b> | <sup>N</sup> PVKKSRRLMS <b>N</b> RESARRS <b>R</b> RRKQEQTSDLE | QVNDLKG | EHSSLLK | QLSNMNH | KYDEAAV | GNRILKA | DIETLRA | KVKMAEE | TVKRVT  |         |         |
|               | T                                                             |         |         |         |         |         |         |         |         |         |         |
| <b>bZIP53</b> | DERKRRKRMIS <b>N</b> RESARRS <b>R</b> MRKQKQLGDLI             | EVTLLKN | DNAKITE | QVDEASK | KYIEMES | KNNVLRA | QASELTD | RLRSLNS | VLEMVEE |         |         |
| <b>bZIP25</b> | <sup>N</sup> PVKRARRMLS <b>N</b> RESARRS <b>R</b> RRKQEQMNEFD | QVGQLRA | EHSTLIN | RLSDMNH | KYDAAAV | DNRILRA | DIETLRT | KVKMAEE | TVKRVT  |         |         |
|               | T                                                             |         |         |         |         |         |         |         |         |         |         |
| <b>bZIP10</b> | PVKKSRRLMS <b>N</b> RESARRS <b>R</b> RRKQEQTSDLET             | QVNDLKG | EHSSLLK | QLSNMNH | KYDEAAV | GNRILKA | DIETLRA | KVKMAEE | TVKRVT  |         |         |
| <b>bZIP25</b> | PVKRARRMLS <b>N</b> RESARRS <b>R</b> RRKQEQMNEFDT             | QVGQLRA | EHSTLIN | RLSDMNH | KYDAAAV | DNRILRA | DIETLRT | KVKMAEE | TVKRVT  |         |         |

## B

|                      | Homodimer            |                     |
|----------------------|----------------------|---------------------|
|                      | Attractive<br>(g↔e') | Repulsive<br>(g↔e') |
| bZIP53               | 4                    | 2                   |
| bZIP10               | 4                    | 0                   |
| bZIP25               | 6                    | 0                   |
| Putative Heterodimer |                      |                     |
| bZIP53+bZIP10        | 3                    | 1                   |
| bZIP53+bZIP25        | 4                    | 1                   |
| bZIP10+bZIP25        | 5                    | 0                   |

**Supplementary Figure S6** Amino acid sequences of bZIP53, bZIP10, and bZIP25. **A**) The delineation of N-terminal basic DNA-binding region followed by dimerizing leucine zipper region. Amino acid sequences represented by the single-letter code are aligned with respect to an invariant asparagine (N) and arginine (R) (shown in bold) in the basic region. Only ten amino acids upstream of asparagine are shown. Tenth amino acid (typically a leucine; L<sub>0</sub>) from invariable arginine in the basic DNA-binding region marks the start of the dimerizing leucine zipper. The leucine zipper sequence is grouped into heptad (a,b,c,d,e,f,g)<sub>n=8</sub>. The limit of a coiled coil at C-terminus is defined by the presence of a proline or two consecutive glycines, both likely helix-breaking residues and the absence of charged amino acids in g and e' positions in a heptad. In homodimer coiled coil, interhelical interactions between amino acids in the g position with those in the following e' position are shown as square brackets. Solid square brackets depict attractive interactions between amino acids with opposite charges in g and e' positions (E↔K, K↔E, D↔R) whereas interhelical repulsive interactions between g and e' position amino acids are shown by discontinuous square brackets (K↔R). In the putative heterodimer coiled coil (bZIP53+bZIP10, bZIP53+bZIP25 and bZIP25+bZIP10) attractive interactions between amino acids at g and e' position are shown by solid diagonal lines (E↔K, R↔E, R↔D, K↔D) and repulsive interactions are depicted by discontinuous lines (K↔K, K↔R). **B**) The number of attractive and repulsive g↔e' salt bridges formed in three homodimers and three putative heterodimers.

# Supplementary Figure S7

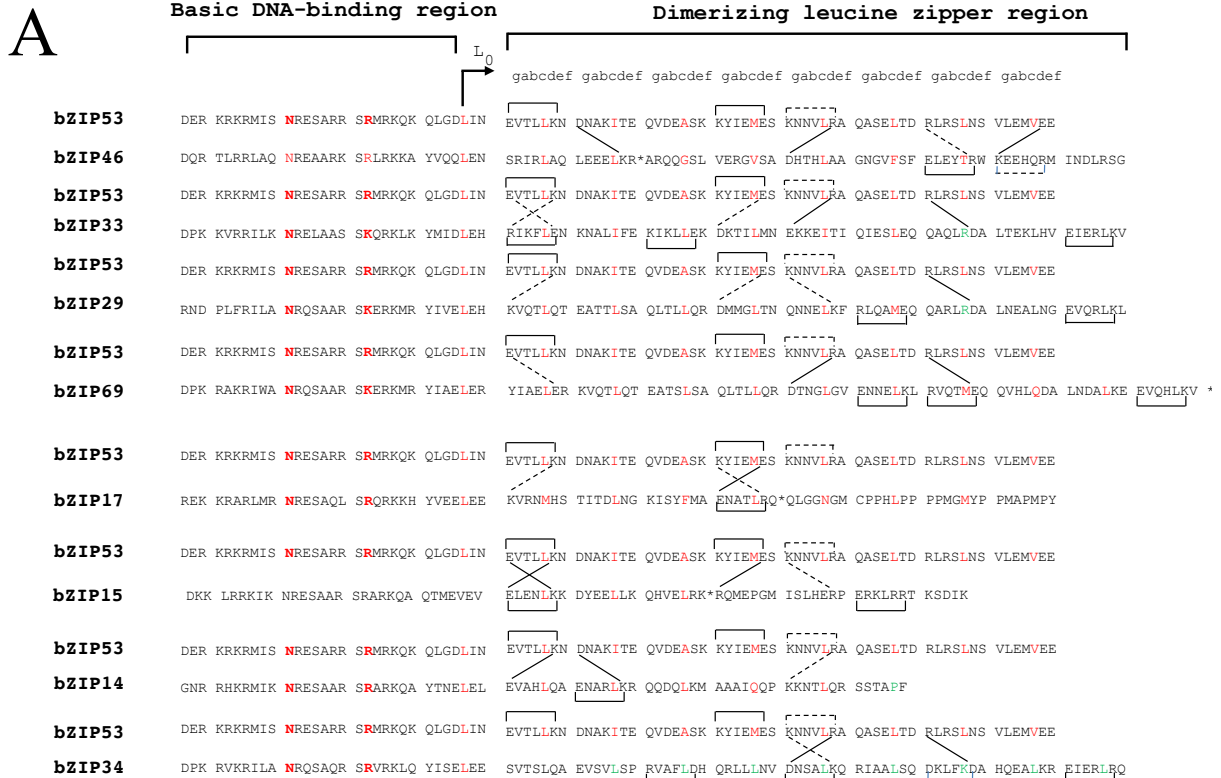

**B**

|               | Homodimer                                |                                         |
|---------------|------------------------------------------|-----------------------------------------|
|               | Attractive<br>( $g \leftrightarrow e'$ ) | Repulsive<br>( $g \leftrightarrow e'$ ) |
| bZIP14        | 2                                        | 0                                       |
| bZIP15        | 4                                        | 0                                       |
| bZIP17        | 2                                        | 0                                       |
| bZIP29        | 4                                        | 0                                       |
| bZIP33        | 6                                        | 0                                       |
| bZIP34        | 6                                        | 2                                       |
| bZIP46        | 2                                        | 2                                       |
| bZIP53        | 4                                        | 2                                       |
| bZIP69        | 6                                        | 0                                       |
|               | Putative Heterodimer                     |                                         |
| bZIP53+bZIP14 | 2                                        | 1                                       |
| bZIP53+bZIP15 | 3                                        | 1                                       |
| bZIP53+bZIP17 | 1                                        | 1                                       |
| bZIP53+bZIP29 | 1                                        | 3                                       |
| bZIP53+bZIP33 | 2                                        | 3                                       |
| bZIP53+bZIP34 | 2                                        | 1                                       |
| bZIP53+bZIP46 | 6                                        | 2                                       |
| bZIP53+bZIP69 | 2                                        | 1                                       |

# Supplementary Figure S7

**Supplementary figure S6** Amino acid sequences of bZIP53, bZIP14, bZIP15, bZIP17, bZIP29, bZIP33, bZIP34, bZIP46, and bZIP69. A) At the top is the delineation of N-terminal basic DNA-binding region followed by dimerizing leucine zipper region. Amino acid sequences represented by the single-letter code are aligned with respect to an invariant asparagine (N) and arginine (R) (shown in red) in the basic region. Only ten amino acids upstream of asparagine are shown. Tenth amino acid (typically a leucine; Lo) from invariable arginine in the basic DNA-binding region marks the start of the dimerizing leucine zipper. The leucine zipper sequence is grouped into heptad (a,b,c,d,e,f, g)<sub>n=8</sub>. The limit of a coiled coil at C-terminus is defined by the presence of a proline or two consecutive glycines, both likely helix-breaking residues and the absence of charged amino acids in g and e' positions in a heptad. Also shown below is a consensus sequence for bZIP motif, where  $\Psi$  represents any hydrophobic amino acid. Proteins are placed in three groups with three homodimers and three potential heterodimers. In homodimer coiled coil, interhelical interactions between amino acids in the g position with those in the following e' position are shown as square brackets. Solid square brackets depict attractive interactions between amino acids with opposite charges in g and e' positions ( $E \leftrightarrow K$ ,  $K \leftrightarrow E$ ,  $D \leftrightarrow R$ ) whereas interhelical repulsive interactions between g and e' position amino acids are shown by discontinuous square brackets ( $K \leftrightarrow R$ ). In the putative heterodimer coiled coil (bZIP53+bZIP14, bZIP53+bZIP15, bZIP53+bZIP29, bZIP53+bZIP33, bZIP53+bZIP34, bZIP53+bZIP46, bZIP53+bZIP69) attractive interactions between amino acids at g and e' position are shown by solid diagonal lines ( $E \leftrightarrow K$ ,  $R \leftrightarrow E$ ,  $R \leftrightarrow D$ ,  $K \leftrightarrow D$ ) and repulsive interactions are depicted by discontinuous lines ( $K \leftrightarrow K$ ,  $K \leftrightarrow R$ ). B) The number of attractive and repulsive g $\leftrightarrow$ e' salt bridges formed in three homodimers and three putative heterodimers. B) The number of attractive and repulsive g $\leftrightarrow$ e' salt bridges formed in homodimers and putative heterodimers.

# Supplementary Figure S8

## Dimerizing leucine zipper region

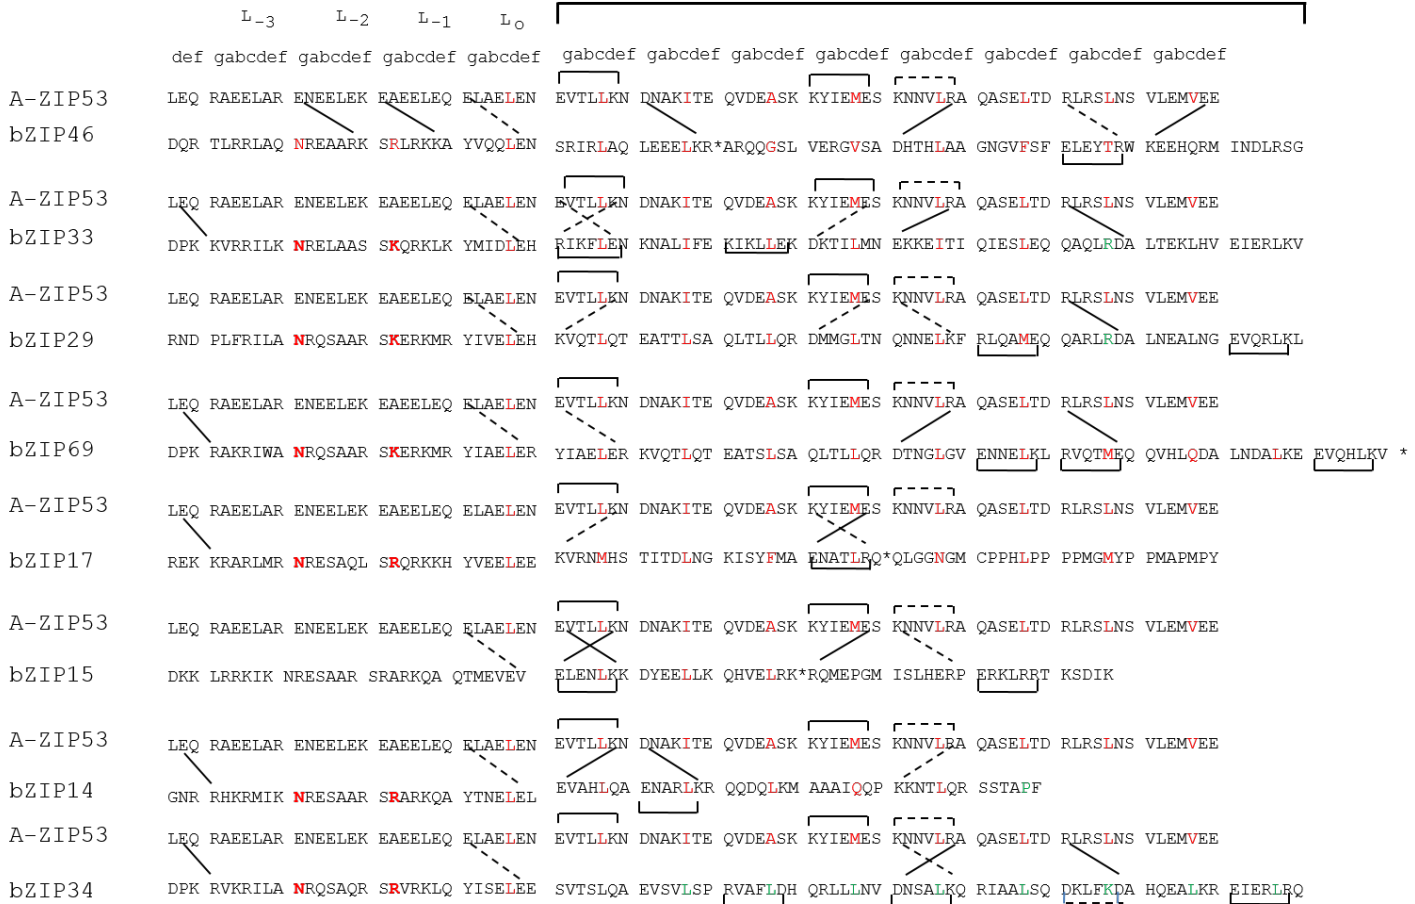

### Putative Heterodimer

Attractive (g $\leftrightarrow$ e')

Repulsive (g $\leftrightarrow$ e')

|                | Attractive (g $\leftrightarrow$ e') | Repulsive (g $\leftrightarrow$ e') |
|----------------|-------------------------------------|------------------------------------|
| A-ZIP53+bZIP14 | 2                                   | 2                                  |
| A-ZIP53+bZIP15 | 3                                   | 2                                  |
| A-ZIP53+bZIP17 | 1                                   | 2                                  |
| A-ZIP53+bZIP29 | 1                                   | 4                                  |
| A-ZIP53+bZIP33 | 2                                   | 4                                  |
| A-ZIP53+bZIP34 | 4                                   | 2                                  |
| A-ZIP53+bZIP46 | 2                                   | 2                                  |
| bZIP53+bZIP69  | 2                                   | 2                                  |

## Supplementary Figure S8

Heterodimers between A-ZIP53 and the immunoprecipitated bZIPs **A)** Alignment of acidic helical extensions used in this study with DNA-binding region of wild type bZIPs showing the possible interhelical interactions in homodimers and heterodimers. At the top is shown the coiled coil heptad designations (**a,b,c,d,e,f**, and **g**). A-ZIP53 acidic extension are aligned with the basic region of bZIPs. invariable asparagine at **g** position (L<sub>2</sub>), and arginine at **a** position (L<sub>3</sub>) are shown in bold. In homodimer coiledcoil, interhelical interactions between amino acids in the **g** position with those in the following **e'** position are shown as square brackets. Solid square brackets depict attractive interactions between oppositely charged amino acids in **g** and **e'** positions whereas broken square brackets shows repulsive interactions due to the presence of similar charges (E↔E). In the putative heterodimeric coiled-coil, attractive interactions between **g** and **e'** positions amino acids are shown by solid diagonal lines. **B)** The number of attractive and repulsive **g↔e'** salt bridges formed in homodimers and putative heterodimers.
